# Supplementary material for: Global patterns and rates of habitat transitions across the eukaryotic tree of life
Source: PubMed Central journal article supplement (PMC9525238; doi:10.1038/s41559-022-01838-4), 2022-08-04
Supplement: 41559_2022_1838_MOESM1_ESM.pdf [file 41559_2022_1838_MOESM1_ESM.pdf]

---

**Supplementary information**

---

**Global patterns and rates of habitat transitions across the eukaryotic tree of life**

---

In the format provided by the authors and unedited

# Global patterns and rates of habitat transitions across the eukaryotic tree of life

## Supplementary Information

Mahwash Jamy<sup>1</sup>, Charlie Biwer<sup>1</sup>, Daniel Vaulot<sup>2,3</sup>, Aleix Obiol<sup>4</sup>, Hongmei Jing<sup>5</sup>, Sari Peura<sup>6,7</sup>, Ramon Massana<sup>4</sup>, Fabien Burki<sup>1,7\*</sup>

<sup>1</sup> Department of Organismal Biology (Systematic Biology), Uppsala University, Uppsala, Sweden

<sup>2</sup> Sorbonne Université, CNRS, UMR7144, Team ECOMAP, Station Biologique, Roscoff, France

<sup>3</sup> Asian School of the Environment, Nanyang Technological University, Singapore

<sup>4</sup> Department of Marine Biology and Oceanography, Institut de Ciències del Mar (ICM-CSIC), Barcelona, Spain

<sup>5</sup> CAS Key Lab for Experimental Study Under Deep-sea Extreme Conditions, Institute of Deep-sea Science and Engineering, Chinese Academy of Sciences, Sanya, China

<sup>6</sup> Department of Ecology and Genetics (Limnology), Uppsala University, Uppsala, Sweden

<sup>7</sup> Science for Life Laboratory, Uppsala University, Sweden

\*Corresponding author: [fabien.burki@ebc.uu.se](mailto:fabien.burki@ebc.uu.se)

### **This pdf file contains**

Supplementary Figure 1-16

Supplementary Notes 1-3

Supplementary Tables 1-4

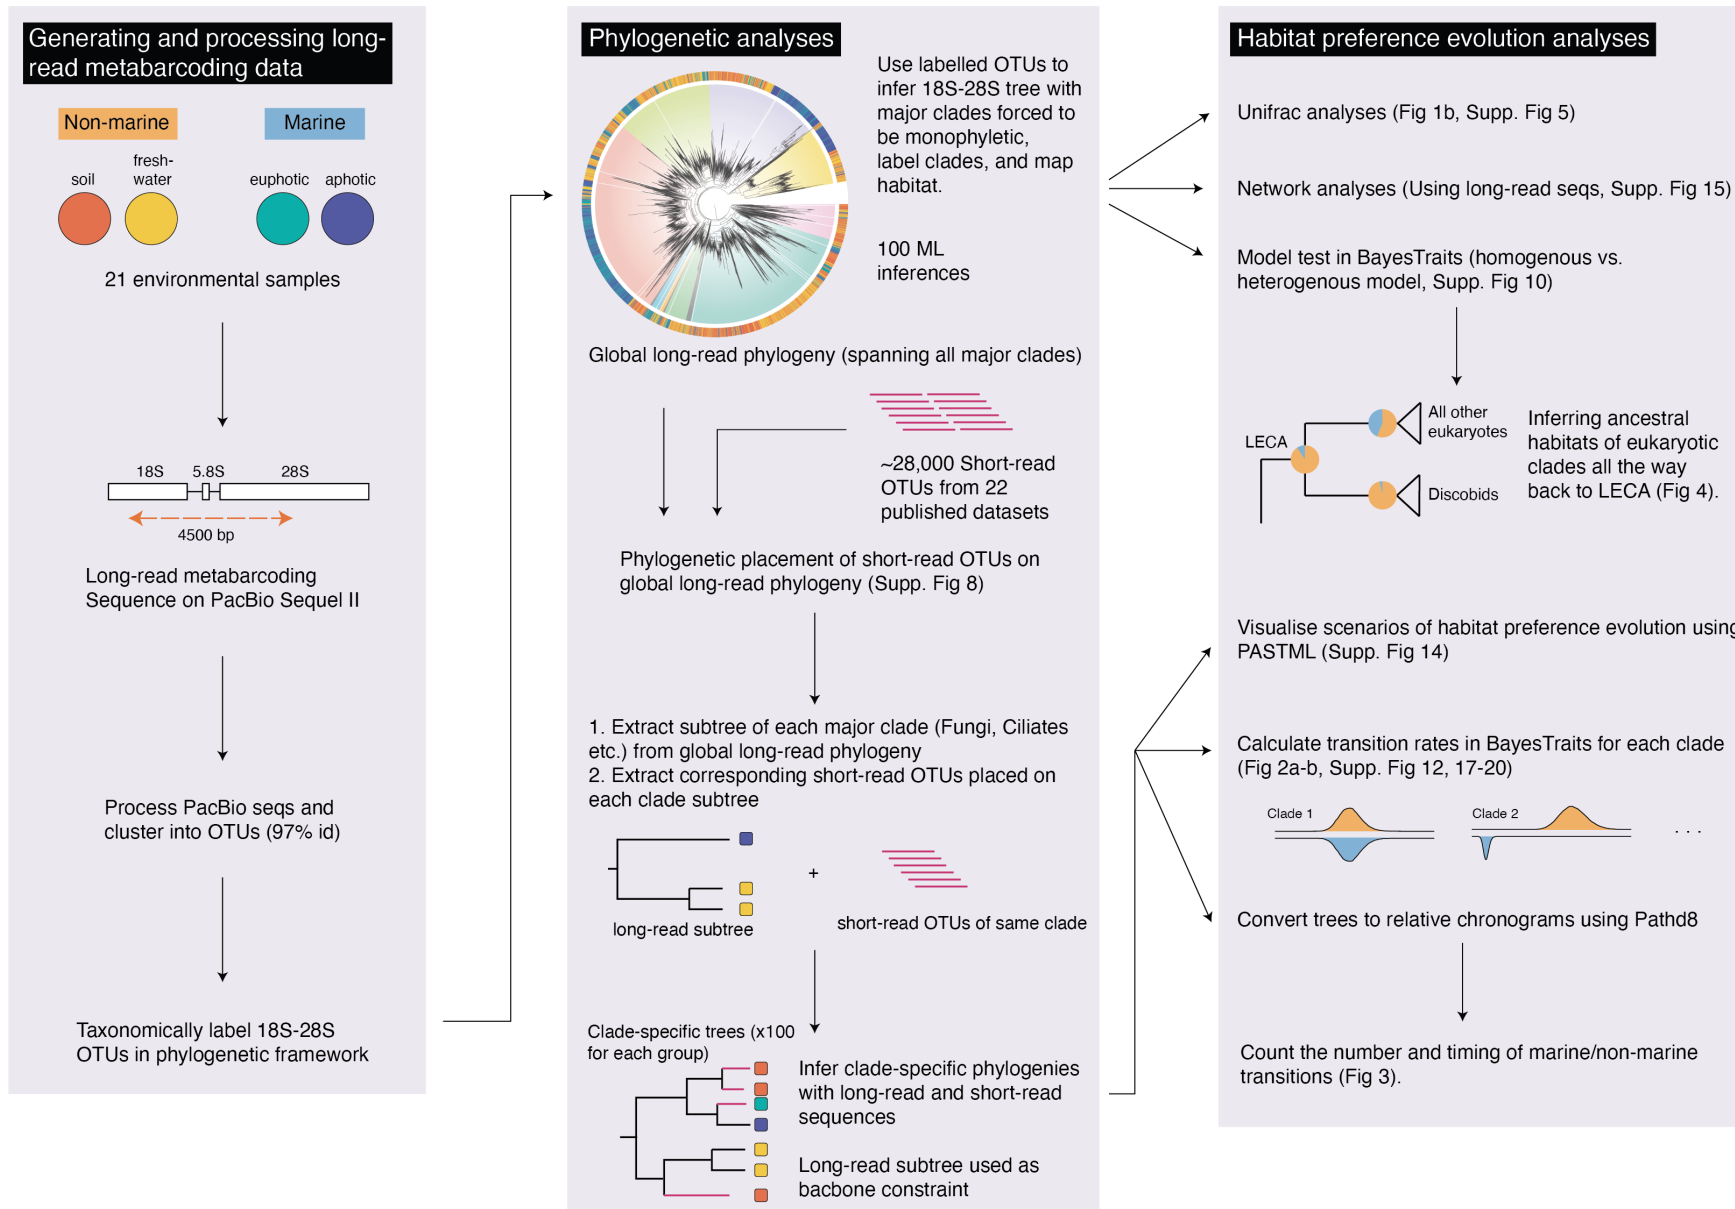

**Supplementary Figure 1.** (On previous page). Broad overview of the analyses carried out in this study. Not all analyses (for example the comparison of long-read and short-read metabarcodes) are depicted.

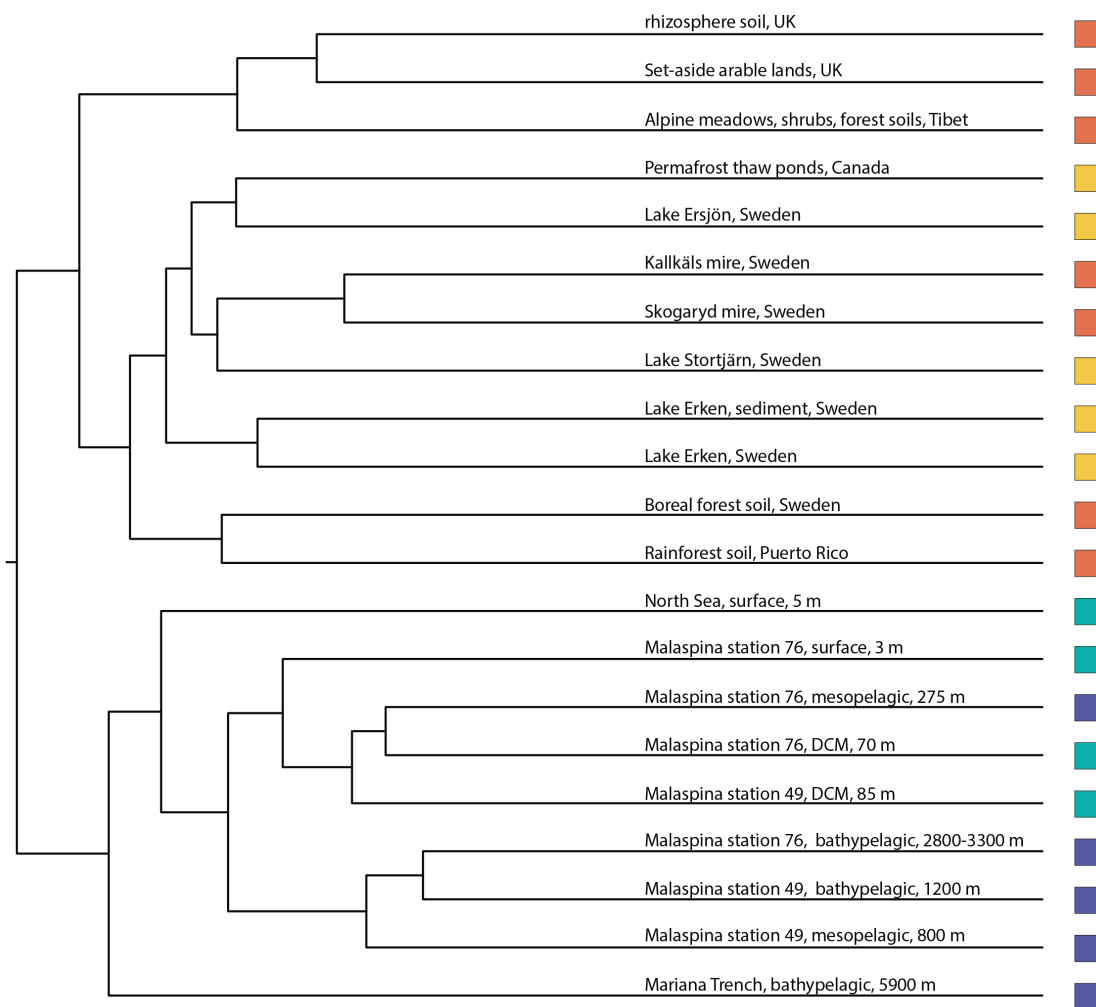

**Supplementary Figure 2.** Hierarchical clustering of the 21 samples sequenced with PacBio based on unweighted UniFrac analyses on the tree in Figure 1a. UniFrac measures the dissimilarity between communities by taking phylogenetic relatedness into account<sup>1</sup>. Here, soil=orange, yellow=freshwater, light blue=marine euphotic, and dark blue=marine aphotic samples. The figure shows a deep split between marine and non-marine communities. Furthermore, on average, marine communities seem to be more closely related to each other than non-marine communities.

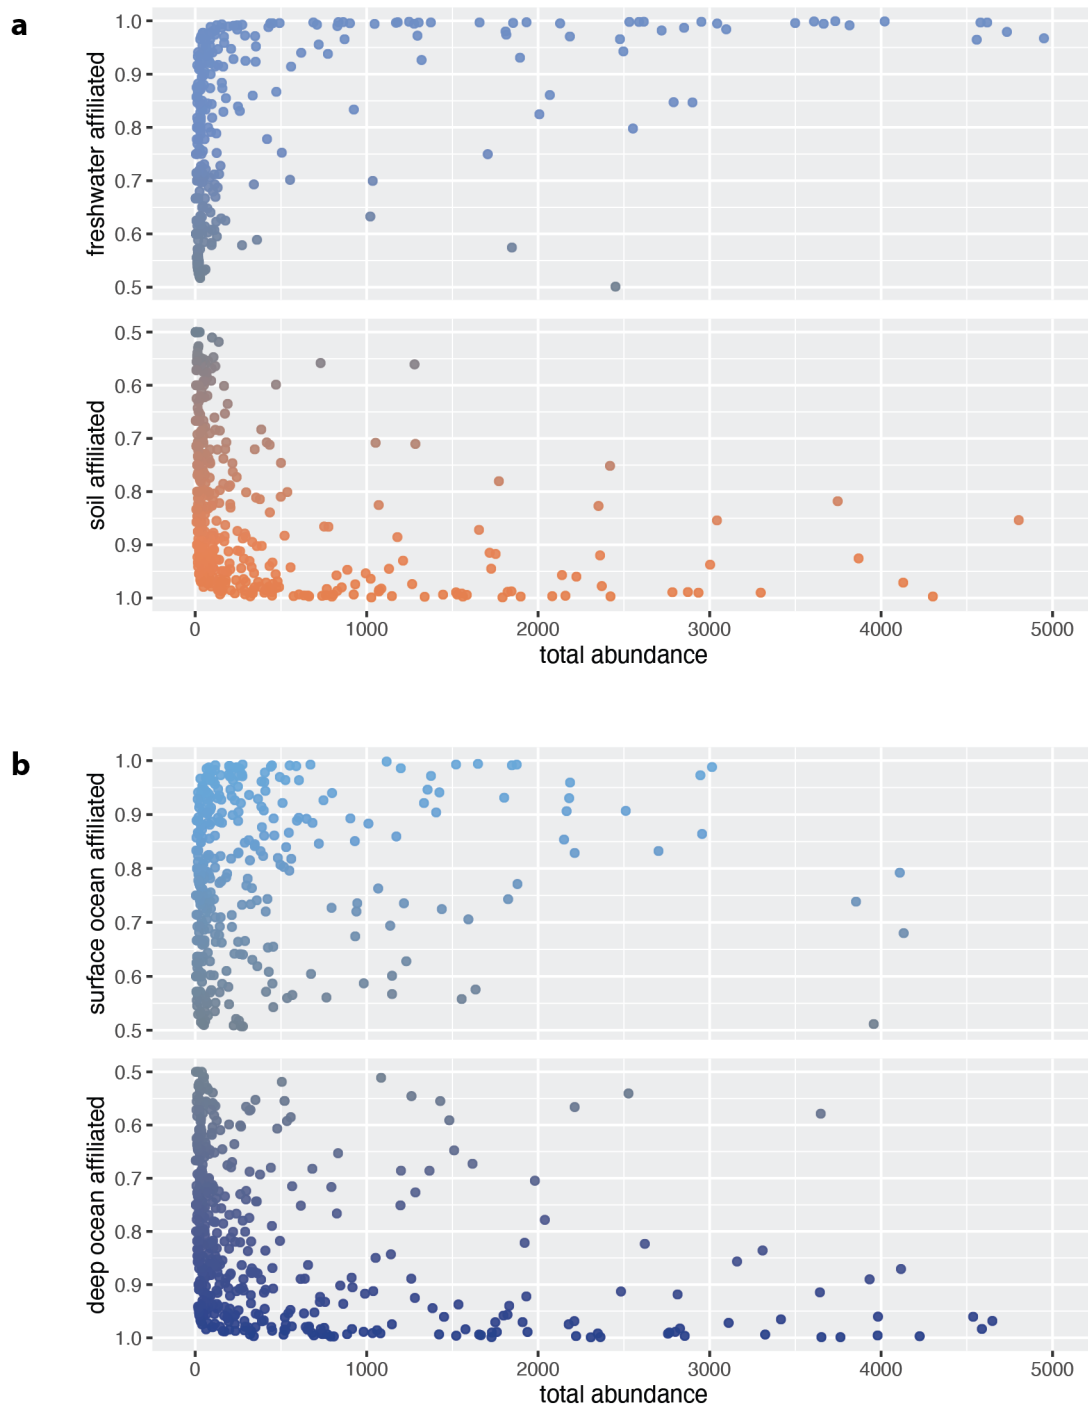

**Supplementary Figure 3.** Distribution patterns of (a) the 723 (out of 771) shared OTUs between freshwater and soil PacBio samples, and (b) the 801 (out of 854) shared OTUs between the surface and deep ocean. All OTUs were clustered at 97% similarity. The x-axis represents the total number of reads in the OTU (a cut-off of 5000 reads was chosen as shared OTUs with higher abundances were spurious), and the y-axis represents affiliation to each environment as measured by the (number of reads in a habitat) / (total number of reads). This analysis follows the reasoning presented in <sup>2</sup>. Briefly, shared OTUs do not necessarily represent generalists across two habitats, but can also represent contamination, i.e. taxa that ended up in another habitat due to run-off, water mixing etc. To differentiate between the two, the affiliation to each habitat can be measured. For instance, if a shared

OTU between soil and freshwater habitats has roughly half of its reads present in soil and half in freshwater, then it can be assumed that the taxon is more likely to be a generalist. However, if the shared OTU has 90% of its reads in soil habitats, and only 10% in freshwater, it is more likely that the taxon lives in soil, but ended up in freshwater due to run-off or some other way. The analysis shows a number of generalists in both **(a)** and particularly in **(b)**. As in Sieber et al. <sup>2</sup>, “generalists” tend to be taxa with lower read abundances overall. Since the OTUs were clustered at 97% similarity, it is also possible that “generalists” are represented by closely related species with their own specific niches.

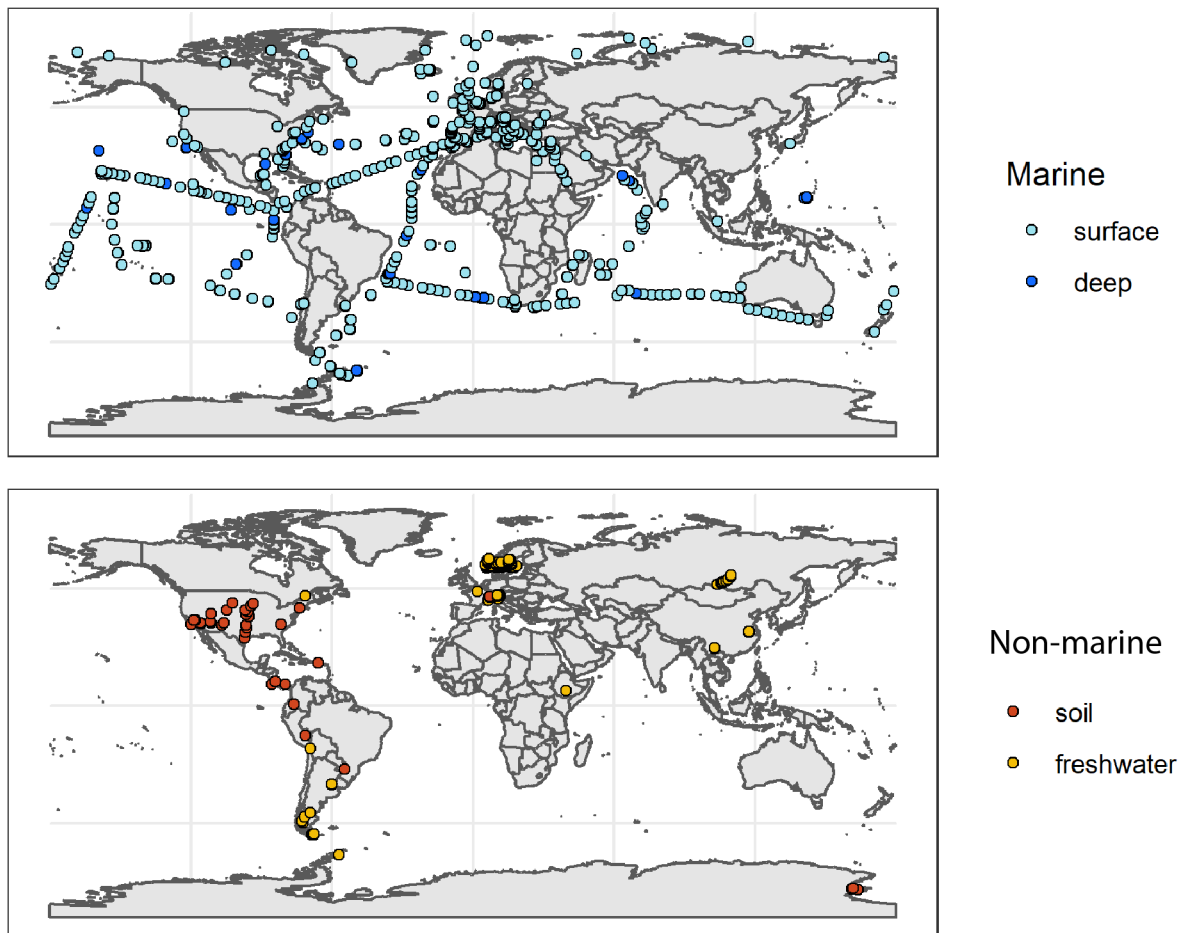

**Supplementary Figure 4.** Geographical locations corresponding to the short-read metabarcoding data. The upper panel showcases the provenance of marine samples, from the marine euphotic (light blue) and the marine aphotic (dark blue). The lower panel displays samples originating from non-marine habitats, with soil samples in red and samples from freshwater systems (lakes, ponds, creeks and rivers) in yellow.



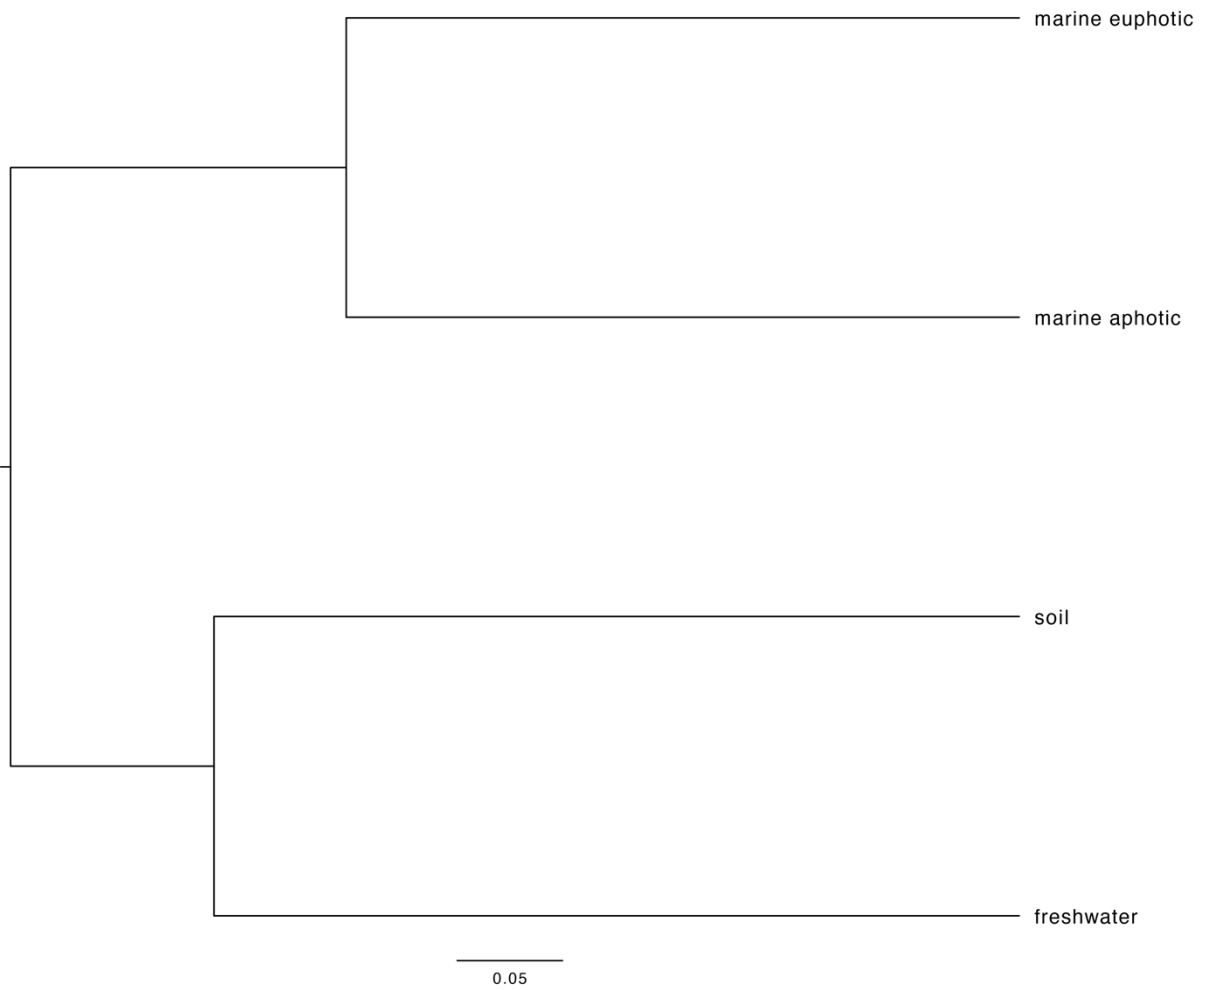

**Supplementary Figure 5.** UPGMA dendrogram based on Earth mover's distance between placement distributions of marine euphotic, marine aphotic, soil, and freshwater short-read OTUs on the global long-read eukaryotic phylogeny (Supplementary Figure 8). The earth mover's distance in this context refers to the minimum amount of "work" required to shift the placement distribution of one habitat to the distribution of another habitat.

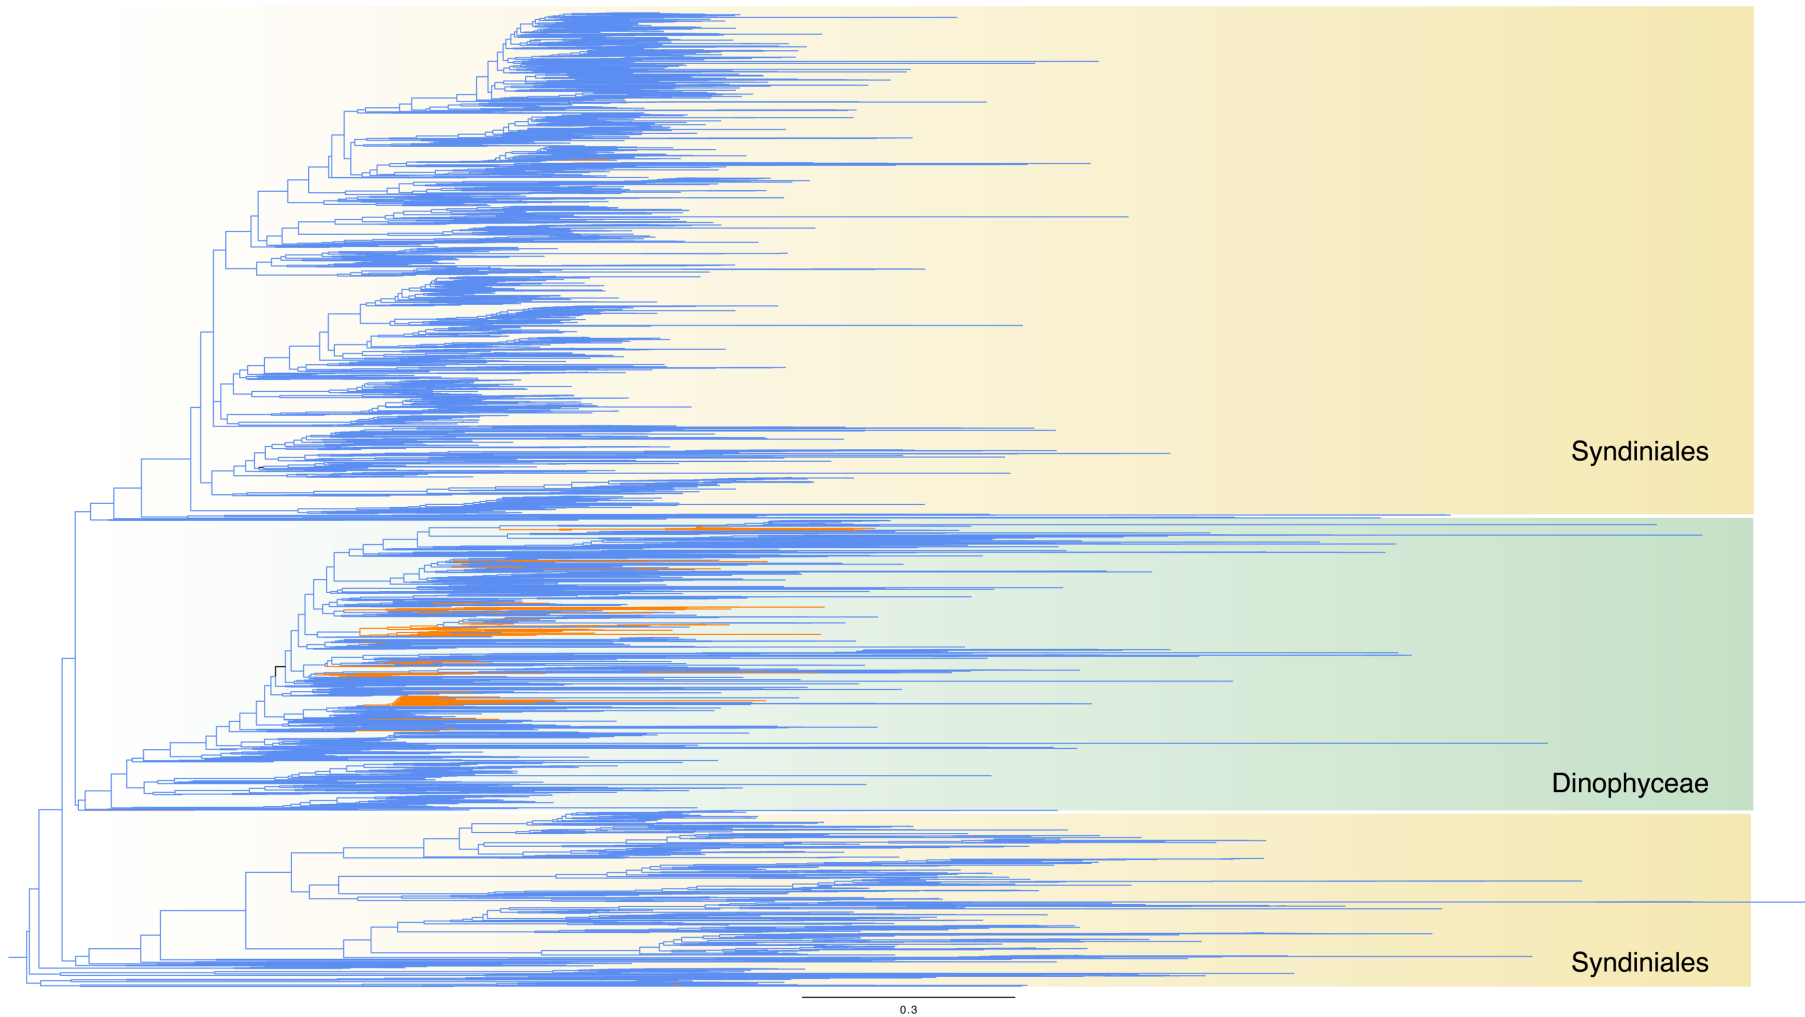

**Supplementary Figure 6.** Clade-specific (long-read + short-read) phylogeny of dinoflagellates (7154 taxa) (one phylogeny was randomly chosen for display from the set of 100 trees). Branches in blue represent marine clades, while branches in orange represent non-marine clades. This visualisation allows us to make the striking observation that habitat transitions seem to have occurred only in the largely mixotrophic Dinophyceae (also called core dinoflagellates), while almost no habitat transitions have occurred in the parasitic Syndiniales clades.

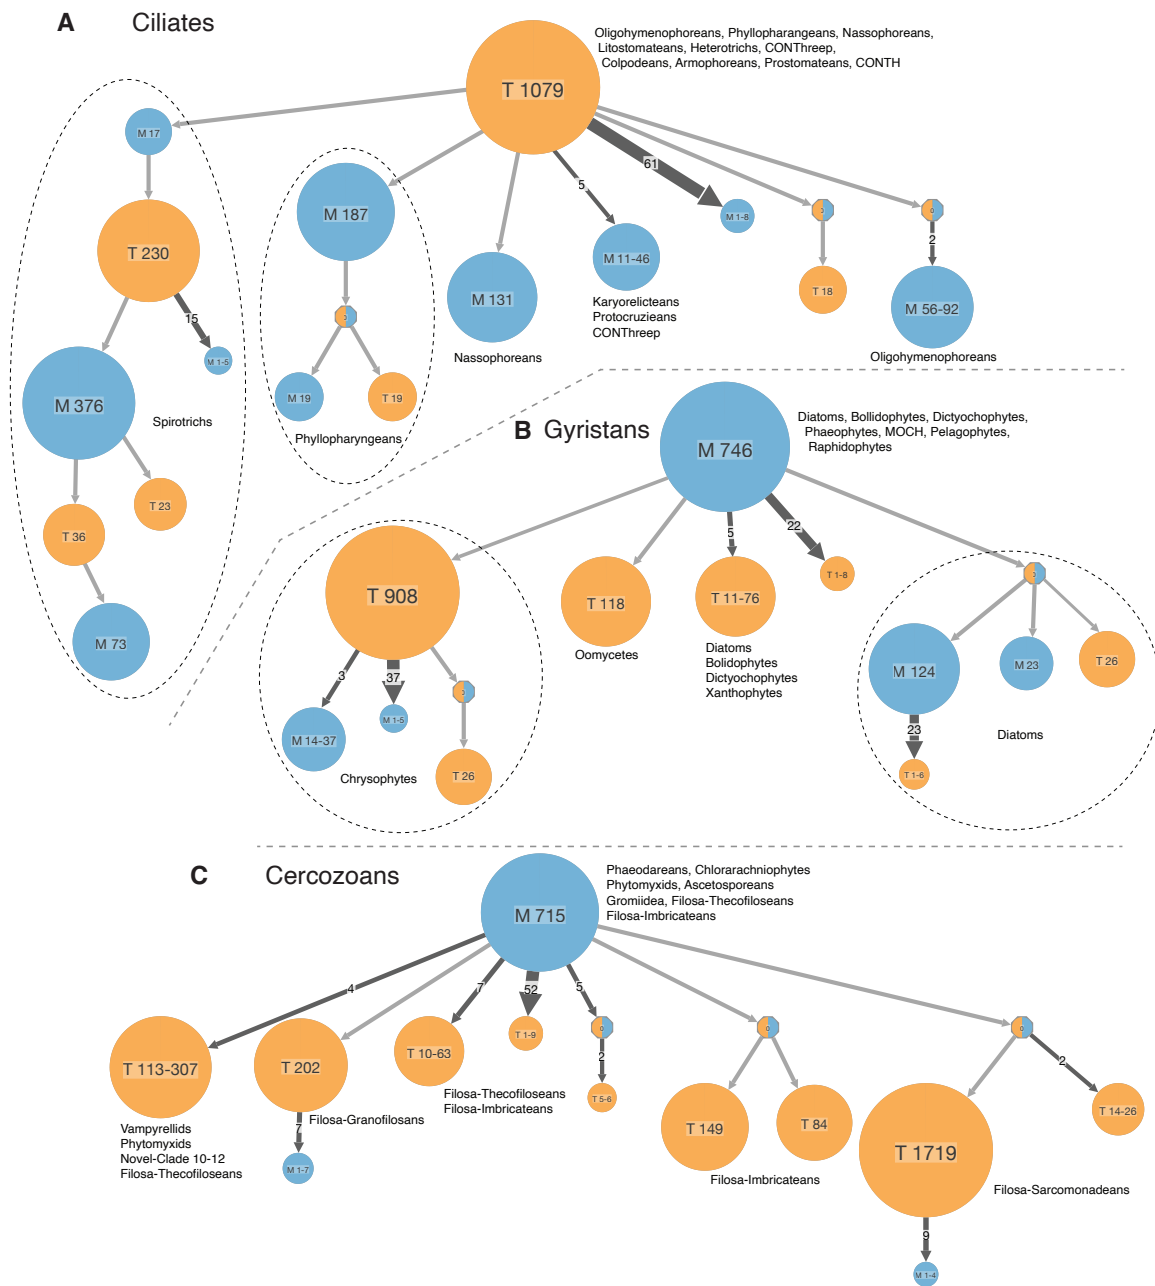

**Supplementary Figure 7.** Simplified possible ancestral scenarios depicted for **(A)** Ciliates, **(B)** Gyristans, and **(C)** Cercozoans as generated by PASTML using marginal posterior probability approximation (MPPA) with an F-81 like model. For this compressed visualisation, parts of the tree with no state changes are collapsed into circles, with the number in each circle indicating the number of taxa. Orange circles depict non-marine clades, and blue circles depict marine clades. We display the eukaryotic classes represented in each circle, for instance, the first orange circle in ciliates indicates a non-marine origin, with 1079 taxa representing oligohymenophoreans, nassophoreans, colpodeans and many other ciliate classes. Thin grey lines represent a single transition event. For example, Panel A shows a single non-marine to marine transition leading to spirotrichs. Thick lines represent multiple transition events with the associated number indicating the number of such events. For example, within spirotrichs (Panel A), there were 15 transition events leading to marine clades of sizes one to

five taxa. For the sake of simplification, PASTML displays only major transition events and hides minor ones (further from the root). Therefore certain transition events are not depicted, such as transitions from marine to non-marine environments in chrysophytes, and such as transitions from non-marine to marine environments in vampyrellids.

This figure depicts the high number of serial transitions in spirotrich ciliates for which we can observe repeated re-colonizations of marine and non-marine habitats. Also depicted are a high number of independent transitions within diatoms, chrysophytes (in Panel **B**), and thecofiloseans and imbricateans (in Panel **C**) in accordance with Supplementary Figure 12.

This figure also shows transition events which led to the establishment of several key-deep branching lineages. This pattern is best exemplified by cercozoans, where one putative transition from marine to non-marine environments led to the diversification of vampyrellids, a group of predatory amoebas which hunt algae (Panel **C**); and another putative transition in the same direction led to the largely uncharacterized Novel-10-12 clade<sup>3</sup> which is commonly found in freshwaters.

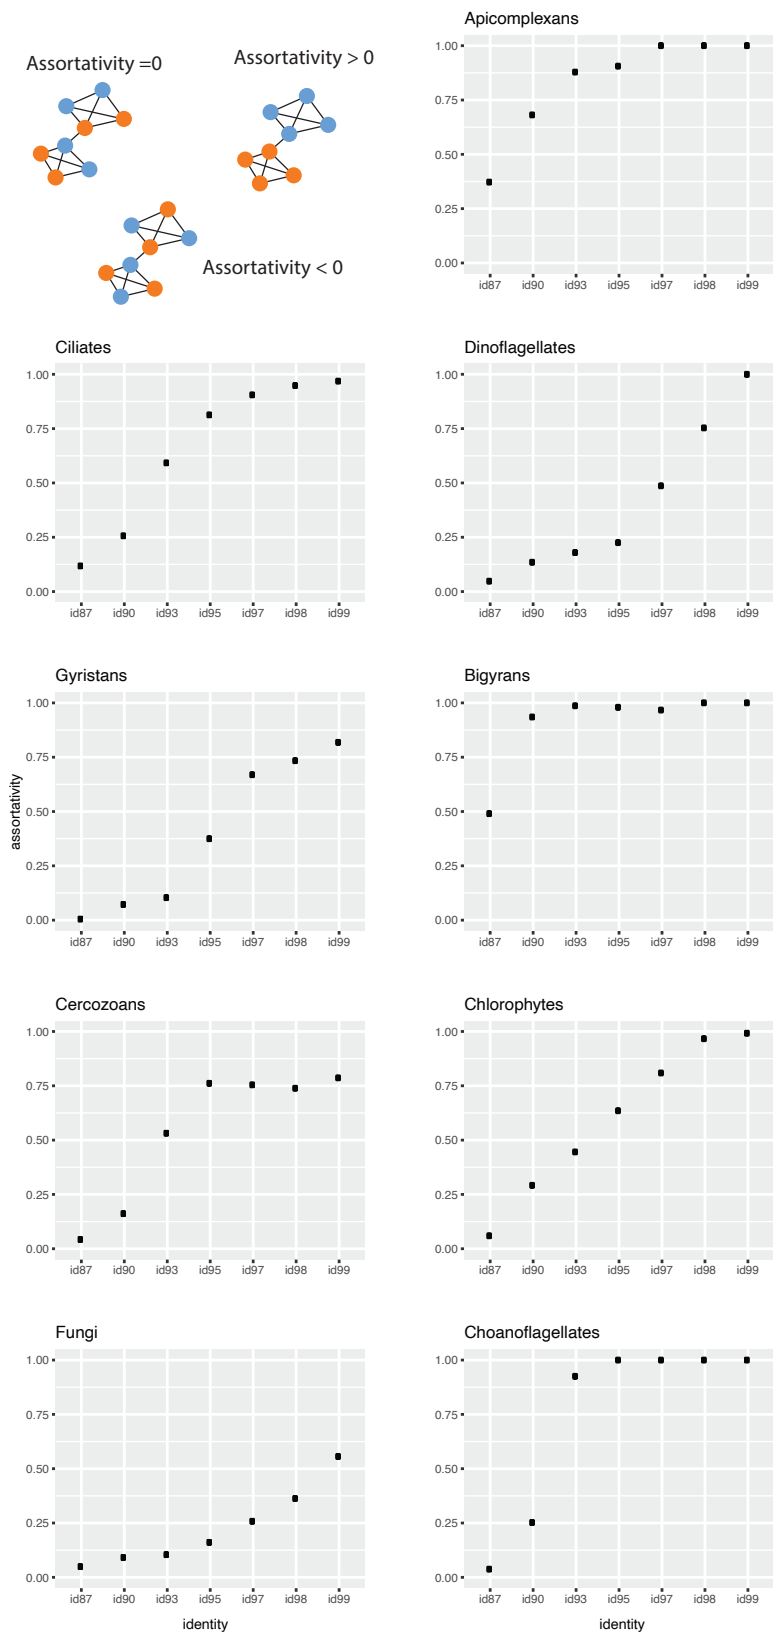

**Supplementary Figure 8.** Sequence similarity network analyses on PacBio sequences. 18S sequences were clustered at different similarity thresholds to produce networks. A simple representation is shown

in the top right panel, where each node represents a sequence, and each edge represents the connection between nodes. The assortativity of marine and non-marine sequences was measured, which measures whether nodes with the same attribute tend to connect with each other more than random or not. When assortativity = 0, that indicates, in this case, that marine and non-marine nodes connect to each other randomly. When assortativity tends towards 1, that means that marine and non-marine nodes tend to preferentially connect to nodes from the same habitat. With these analyses, we can see that fungi have the lowest assortativity values. This can also be taken to mean that fungal transitions have occurred very recently, so that ribosomal sequences have not had enough time to evolve since the transition.

**A**

|                 | No. of OTUs | Subsample soil (% of OTUs excluded) |                 |               |               |               |               |  |
|-----------------|-------------|-------------------------------------|-----------------|---------------|---------------|---------------|---------------|--|
|                 |             | 5%                                  | 10%             | 20%           | 30%           | 50%           | 70%           |  |
| Soil            | 11,935      | 11,358 - 11,293                     | 10,795 - 10,676 | 9,676 - 9,470 | 8,404 - 8,263 | 6,093 - 5,904 | 3,717 - 3,526 |  |
| Freshwater      | 3,788       | 3,788                               | 3,788           | 3,788         | 3,788         | 3,788         | 3,788         |  |
| Marine euphotic | 9,977       | 9,977                               | 9,977           | 9,977         | 9,977         | 9,977         | 9,977         |  |
| Marine aphotic  | 2,518       | 2,518                               | 2,518           | 2,518         | 2,518         | 2,518         | 2,518         |  |

  

|                 | No. of OTUs | Subsample marine euphotic (% of OTUs excluded) |               |               |               |               |               |  |
|-----------------|-------------|------------------------------------------------|---------------|---------------|---------------|---------------|---------------|--|
|                 |             | 5%                                             | 10%           | 20%           | 30%           | 50%           | 70%           |  |
| Soil            | 11,935      | 11,935                                         | 11,935        | 11,935        | 11,935        | 11,935        | 11,935        |  |
| Freshwater      | 3,788       | 3,788                                          | 3,788         | 3,788         | 3,788         | 3,788         | 3,788         |  |
| Marine euphotic | 9,977       | 9,486 - 9,436                                  | 9,064 - 8,940 | 8,039 - 7,925 | 7,029 - 6,922 | 5,035 - 4,898 | 3,036 - 2,943 |  |
| Marine aphotic  | 2,518       | 2,518                                          | 2,518         | 2,518         | 2,518         | 2,518         | 2,518         |  |

  

|                 | No. of OTUs | Subsample soil + marine euphotic (% of OTUs excluded) |                 |               |               |               |               |  |
|-----------------|-------------|-------------------------------------------------------|-----------------|---------------|---------------|---------------|---------------|--|
|                 |             | 5%                                                    | 10%             | 20%           | 30%           | 50%           | 70%           |  |
| Soil            | 11,935      | 11,419 - 11,279                                       | 10,798 - 10,714 | 9,612 - 9,506 | 8,444 - 8,329 | 6,036 - 5,844 | 3,643 - 3,515 |  |
| Freshwater      | 3,788       | 3,788                                                 | 3,788           | 3,788         | 3,788         | 3,788         | 3,788         |  |
| Marine euphotic | 9,977       | 9,507 - 9,464                                         | 9,047 - 8,977   | 8,059 - 7,911 | 7,025 - 6,953 | 5,023 - 4,944 | 3,005 - 2,959 |  |
| Marine aphotic  | 2,518       | 2,518                                                 | 2,518           | 2,518         | 2,518         | 2,518         | 2,518         |  |

**B**

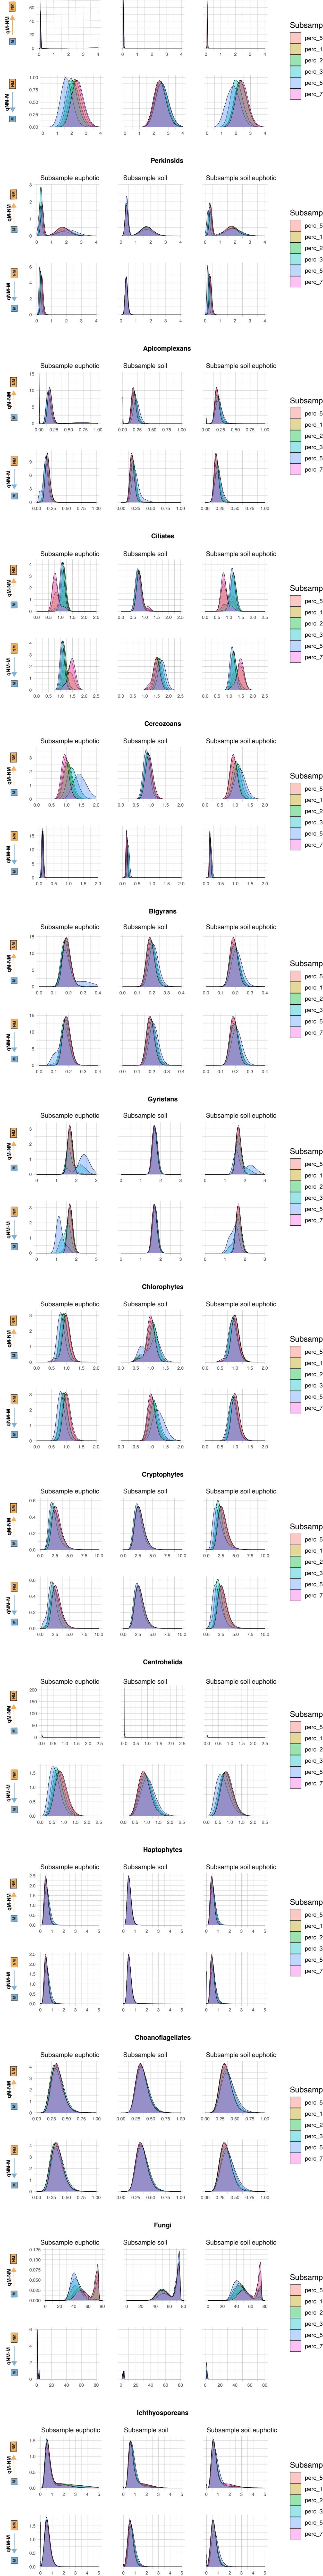

**Supplementary Figure 9.** (On previous page) Sensitivity test to assess how transition rates are impacted by sampling efforts. The short-read metabarcoding surveys included in this study have uneven sampling efforts in the four habitats considered, with the highest numbers of samples and greatest sequencing depth for marine euphotic and soil environments (see also Supplementary Table 4). As a result, marine euphotic and soil habitats had considerably more OTUs as compared to freshwater and marine aphotic habitats. To assess whether this imbalance in sampling effort had any impact on the transition rates inferred, we carried out a sensitivity test where we increasingly subsampled (1) soil, (2) marine euphotic, and (3) both soil and marine euphotic OTUs in a random fashion, and re-estimated transition rates for each clade. For each subsampling level (from 5% to 70% of the OTUs removed), we replicated the test five times.

**(A)** Table showing the number of OTUs retained for each subsampling level. The number of OTUs retained varied slightly in each replicate as different random seeds were used to subsample the fasta files using SeqKit<sup>4</sup>.

**(B)** Density plots of transition rates ( $q_{M-NM}$  and  $q_{NM-M}$ ) for each clade across different subsets of taxa. Most clades show the same patterns of directionality in all cases, even if the values are slightly shifted, e.g. in dinoflagellates and cercozoans. This result indicates that transition rates are largely robust to sampling efforts. Two clades show an exception to this result: ciliates and gyristans. Subsampling marine euphotic taxa (20-50% of taxa) results in  $q_{M-NM}$  and  $q_{NM-M}$  being symmetrical in ciliates, and  $q_{M-NM} > q_{NM-M}$  in gyristans.



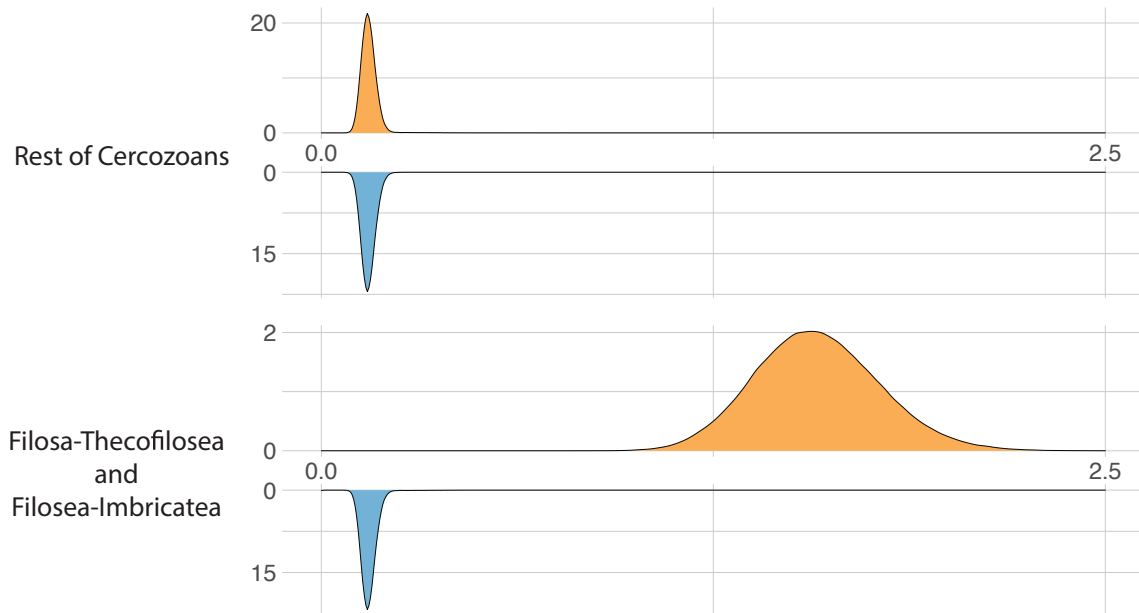

**Supplementary Figure 10.** Habitat transition rates vary within Cercozoans. Here, we used a heterogeneous model of habitat evolution such that  $q_{M-NM}$  (in orange) and  $q_{NM-M}$  (in blue) were estimated separately for Filosa-Thecofilosea + Filosa-Imbricatea, and the rest of Cercozoans. Filosa-Thecofilosea + Filosa-Imbricatea was selected based on visual inspection of the Cercozoan phylogenies (where non-marine and marine lineages were more interspersed and not as distinct).

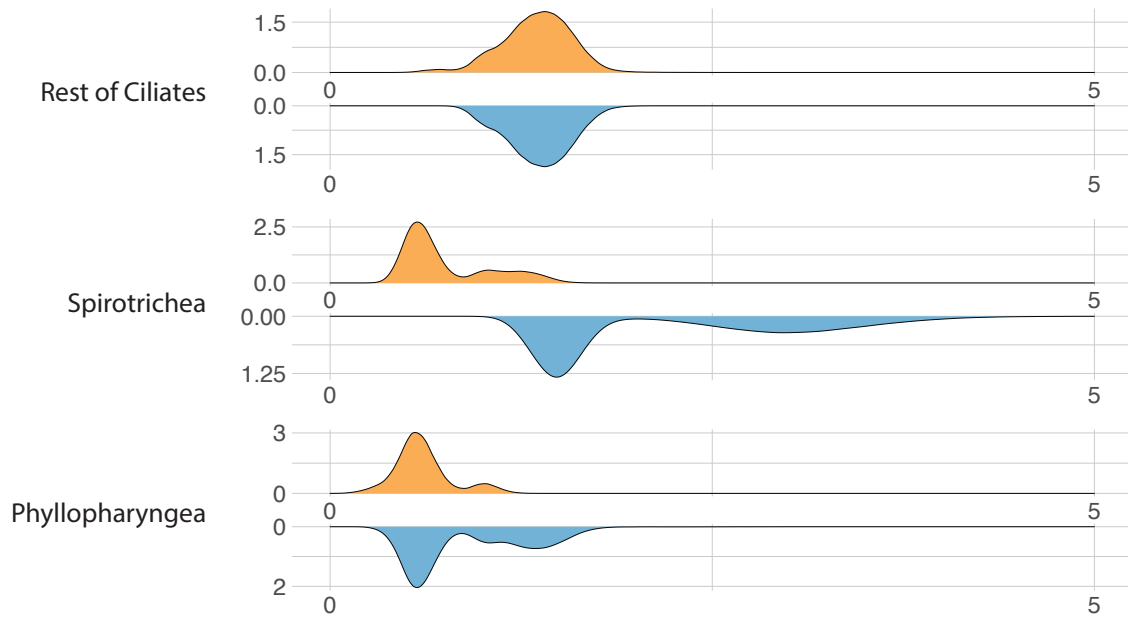

**Supplementary Figure 11.** Habitat transition rates vary within Ciliates. Here, we used a heterogeneous model of habitat evolution such that  $q_{M-NM}$  (in orange) and  $q_{NM-M}$  (in blue) were estimated separately for Spirotrichea, Phyllopharyngea and the rest of Ciliates. Spirotrichea and Phyllopharyngea were selected as they showed multiple putative serial colonization events (see Supplementary Figure 14).

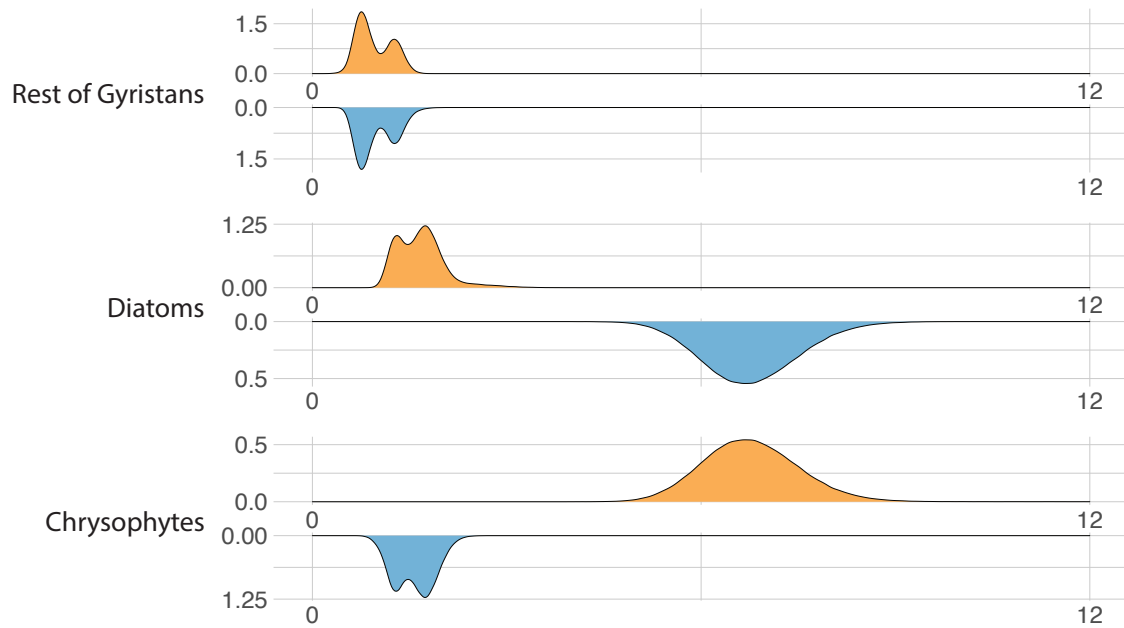

**Supplementary Figure 12.** Habitat transition rates vary within Gyristans. Here, we used a heterogeneous model of habitat evolution such that  $q_{M-NM}$  (in orange) and  $q_{NM-M}$  (in blue) were estimated separately for Diatoms, Chrysophytes and the rest of Gyristans. Diatoms and Chrysophytes seemed to have less distinct marine and non-marine lineages based on visual inspection of the Gyristan phylogenies, hence we chose to characterize these clades separately.

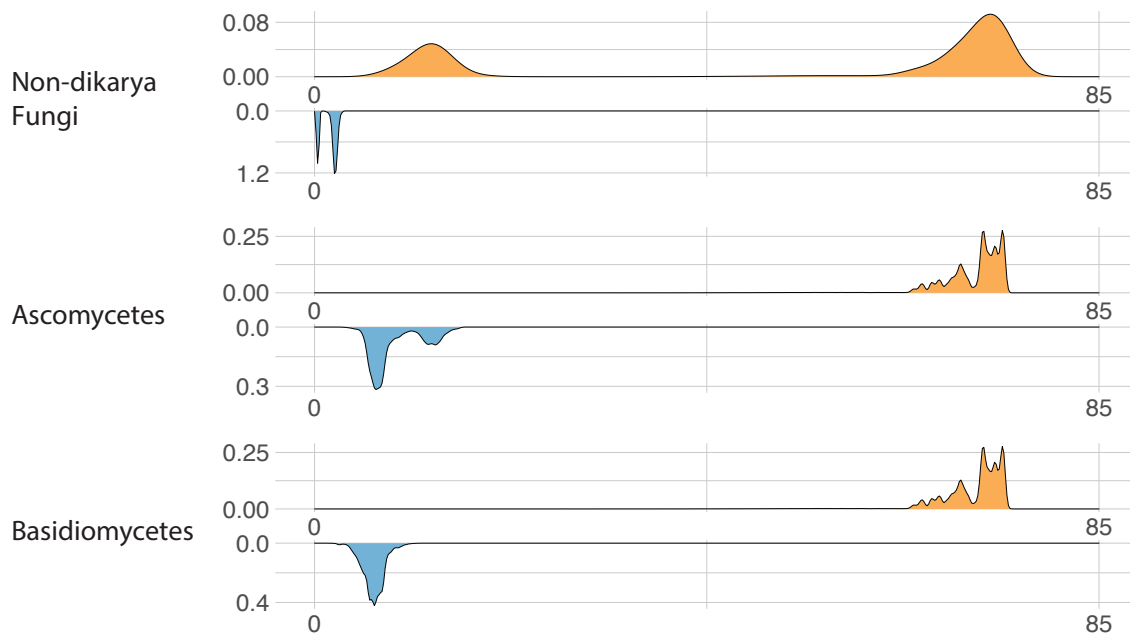

**Supplementary Figure 13.** Habitat transition rates vary within Fungi. Here, we used a heterogeneous model of habitat evolution such that  $q_{M-NM}$  (in orange) and  $q_{NM-M}$  (in blue) were estimated separately for Ascomycetes, Basidiomycetes, and non-Dikarya Fungi. Visual inspection of fungal phylogenies indicated more transition events in Dikarya as compared to non-Dikarya.

**A**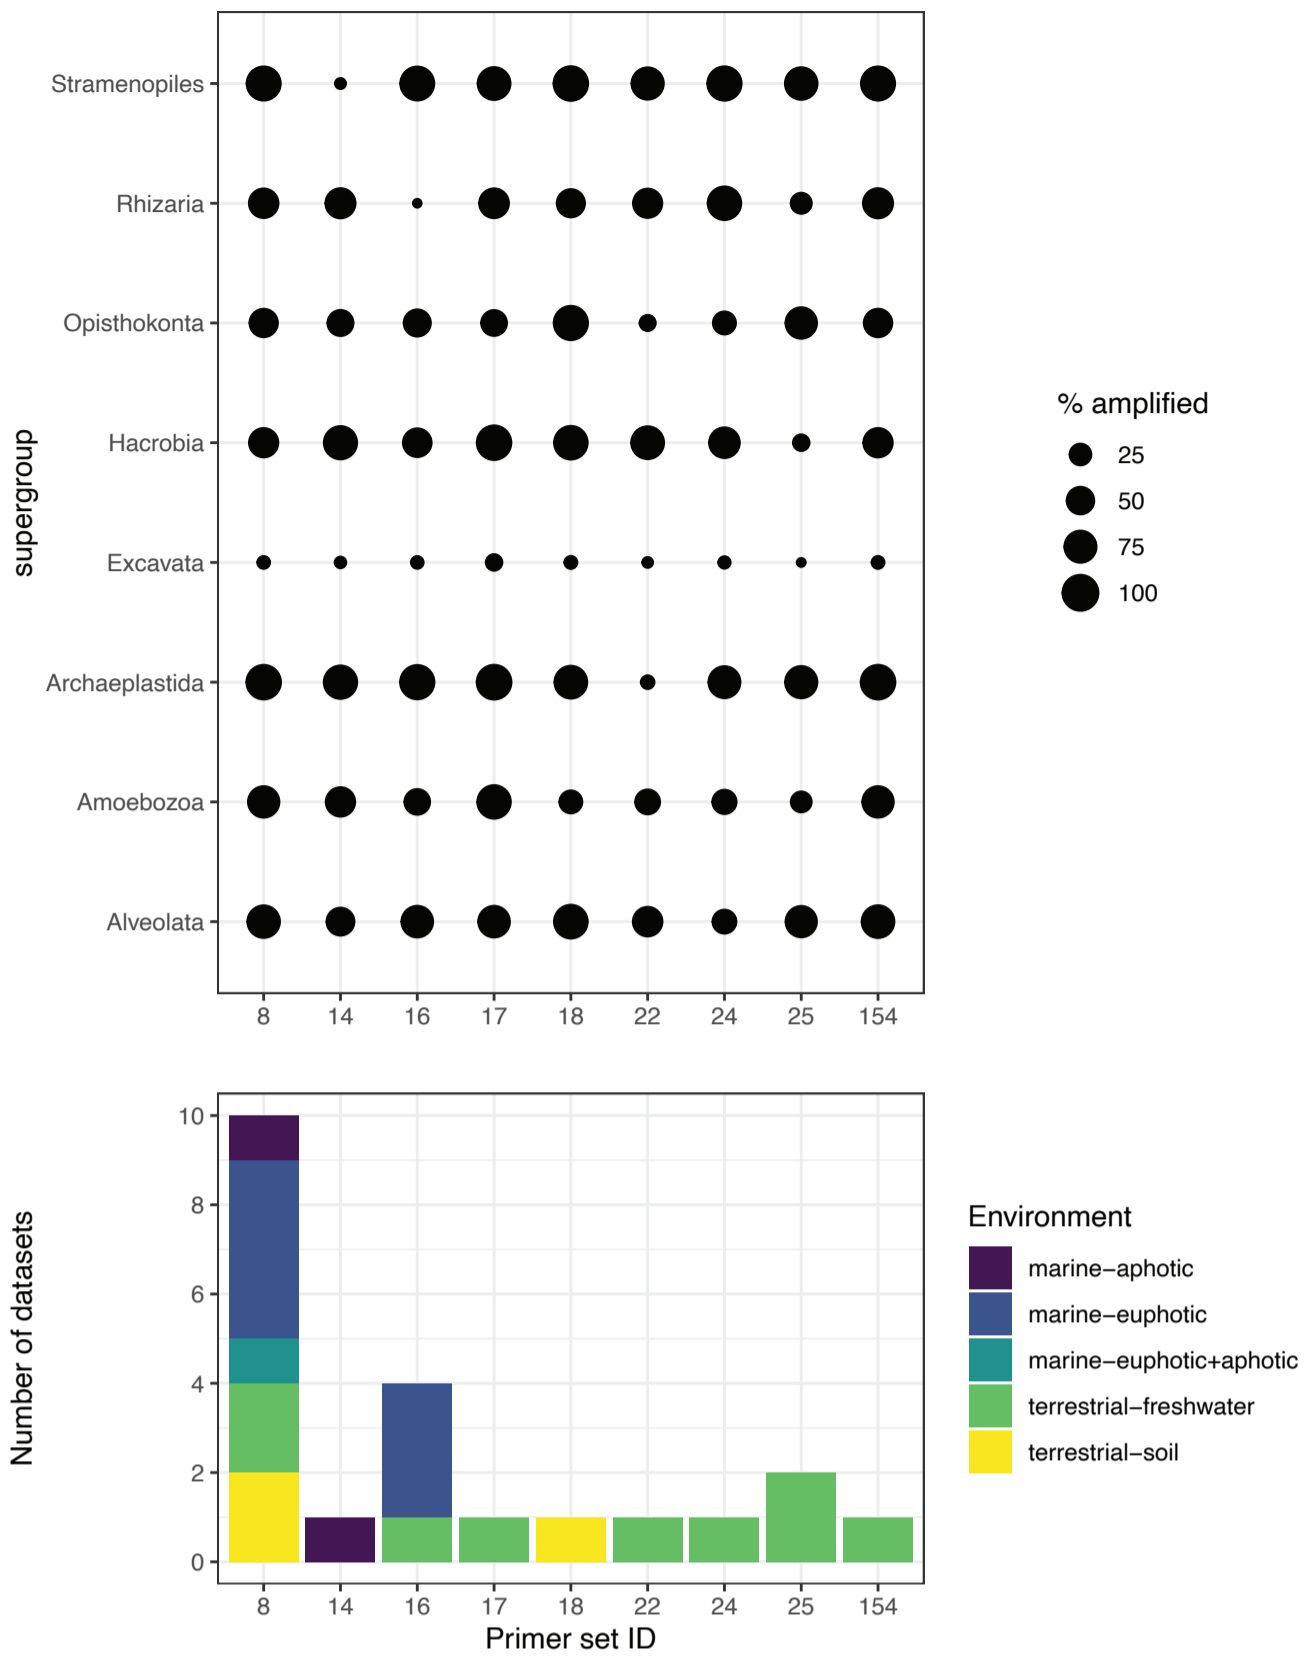**B**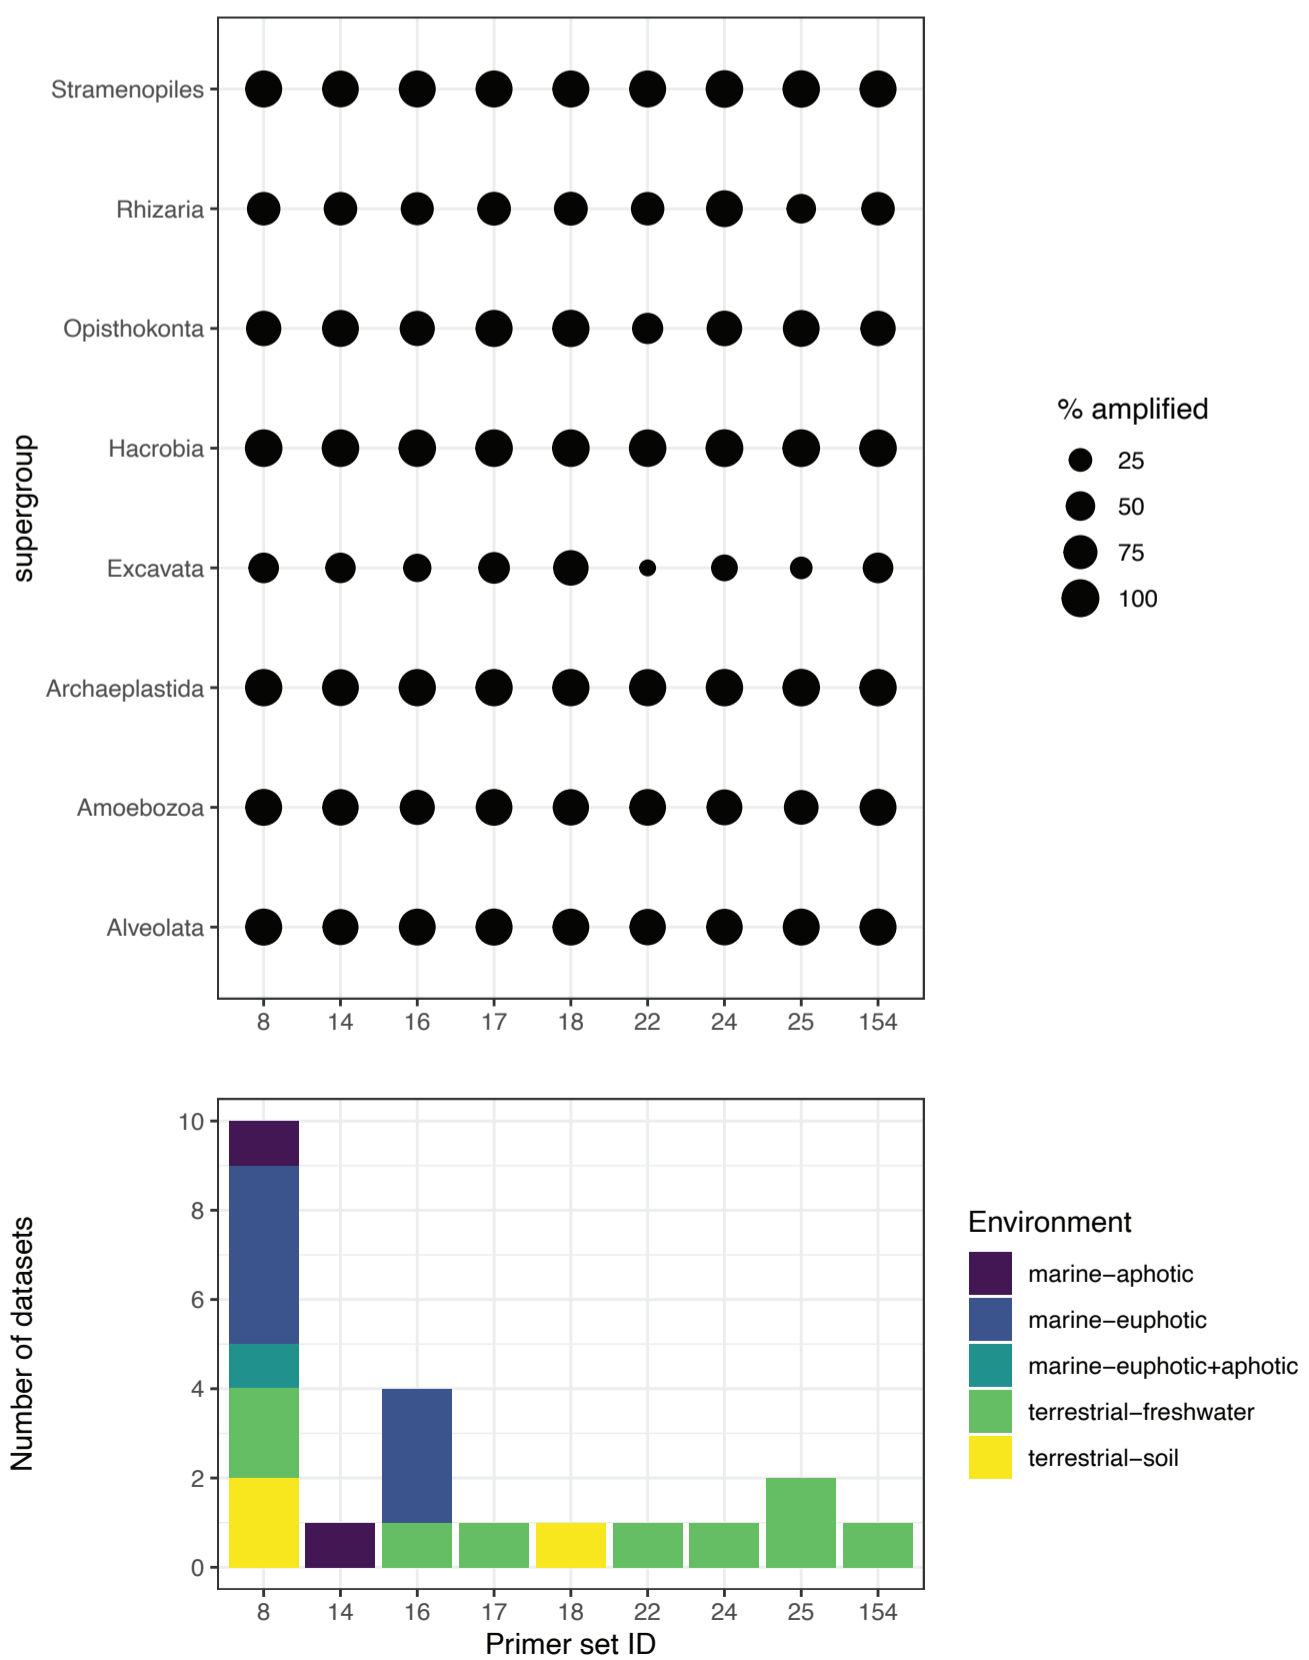

**Supplementary Figure 14.** (On previous page). *In-silico* analysis of the nine primer pairs that generated the short-read data used in this study. Primer set IDs correspond to the ID numbers on the web application of PR<sup>2</sup> primers<sup>5</sup>. **(A)** Primer set specificity when allowing no mismatches. **(B)** Primer set specificity when allowing four mismatches (which matches the default setting for the error-tolerance in Cutadapt<sup>6</sup>, used for trimming primers, assuming primer lengths of 20 base pairs). The results show that no single habitat has been surveyed with primer pairs all biased against the same eukaryotic clade. We can therefore be reasonably confident that we do not detect (false positive) transition events due to eukaryotic lineages being detected in one environment but not in the other due to primer bias.

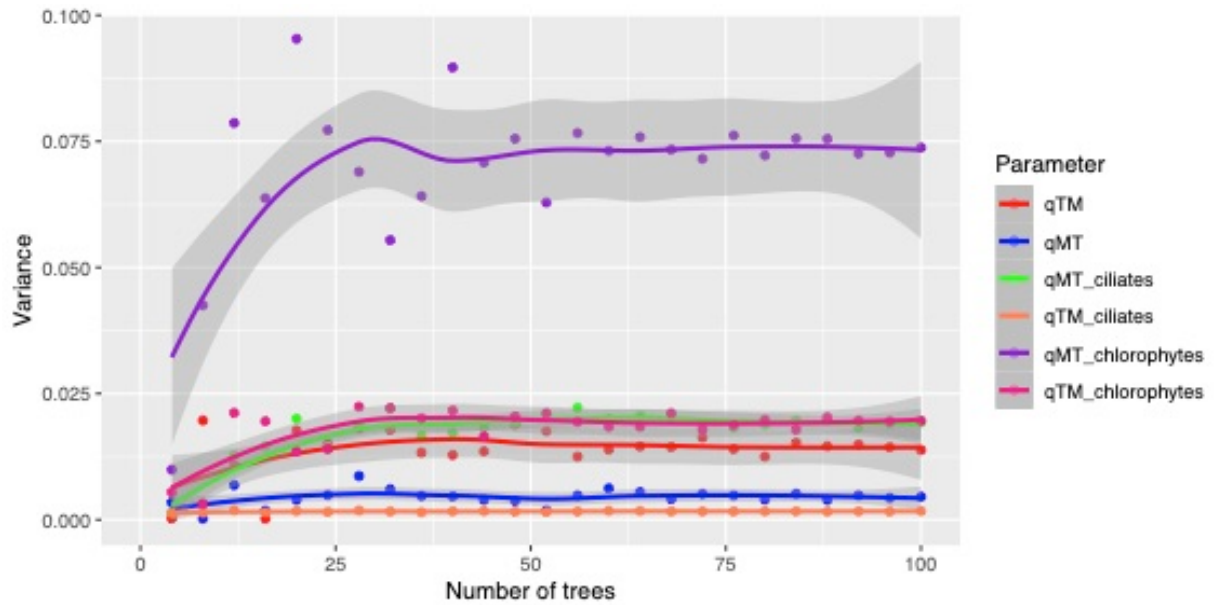

**Supplementary Figure 15.** The saturation of variance values of transition rate parameters as a function of the number of ML trees. Trees were added in randomized order, in groups of four. Only six parameters are shown here for clarity, but the rest also show similar trends. Lines indicate locally estimated scatterplot smoothing (loess) curves with the grey bars representing 95% confidence intervals.

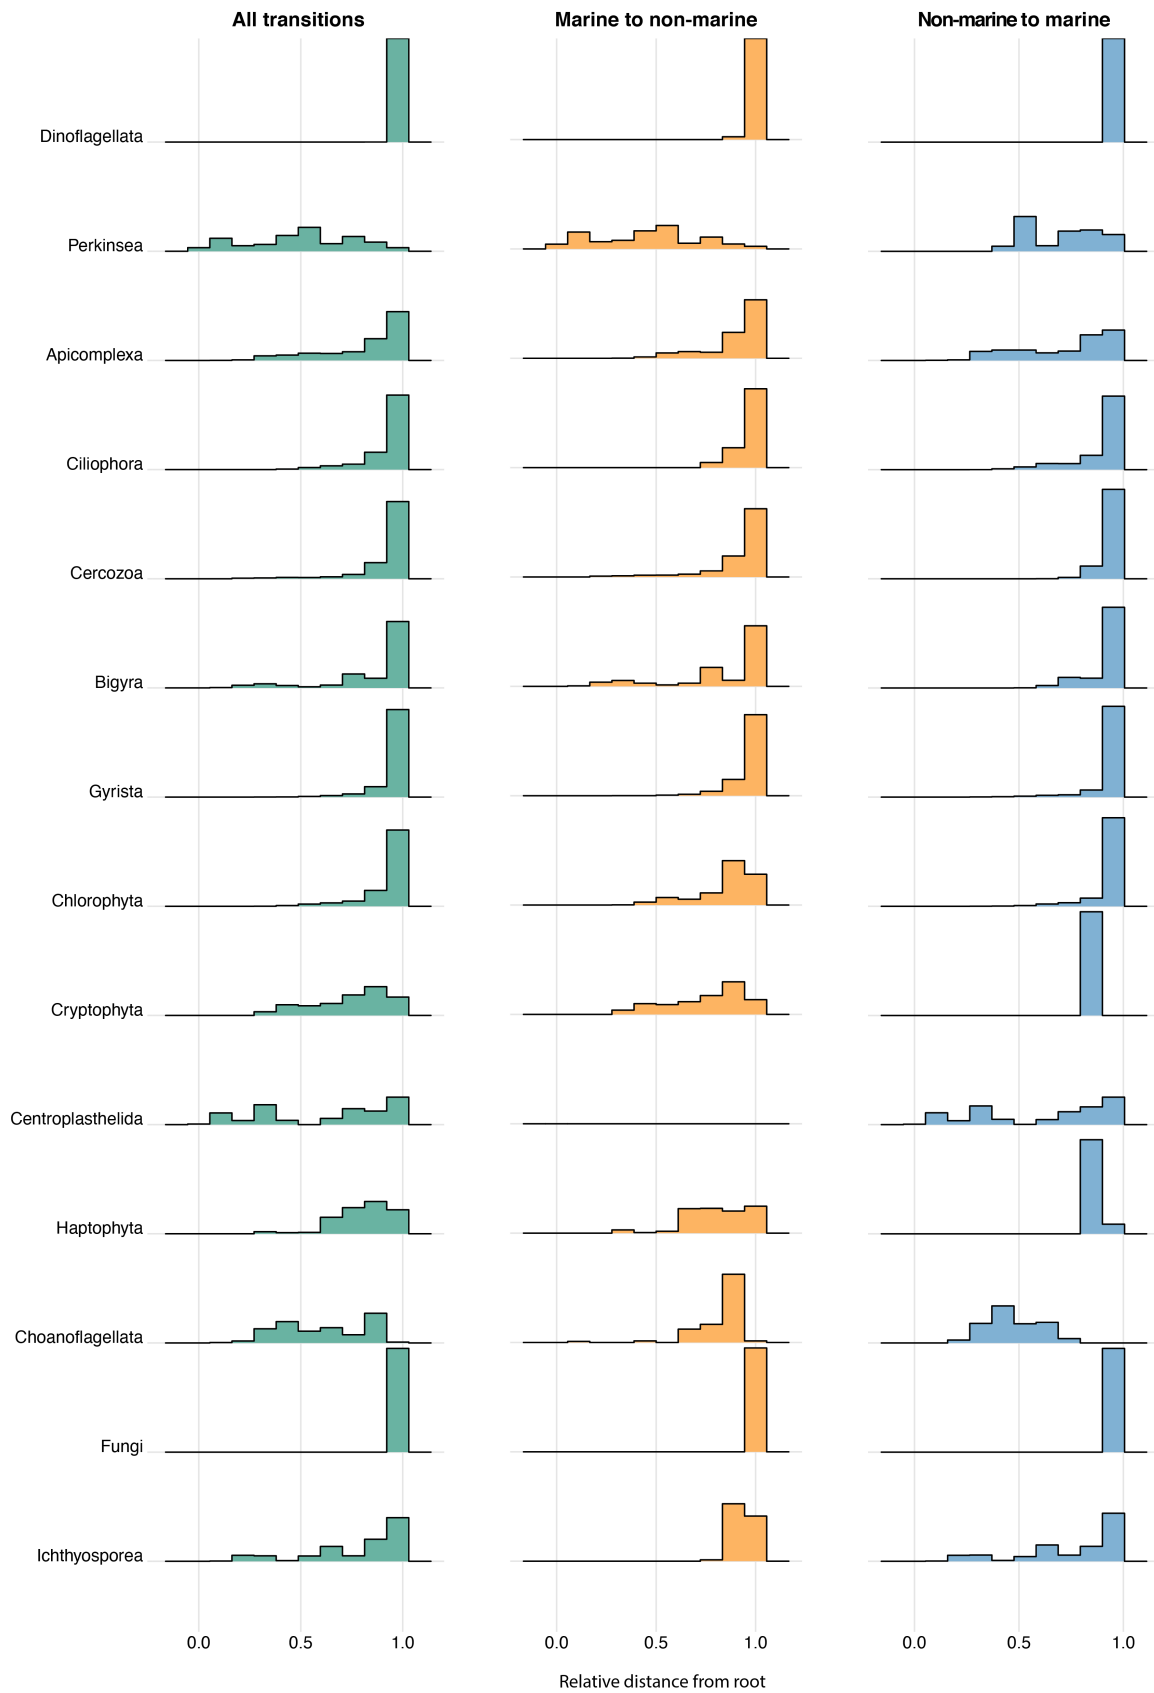

**Supplementary Figure 16.** Ridgeline histogram plots showing relative timing of transitions. Phylogenies were converted to relative chronograms (root age = 1) with TreePL<sup>7</sup>. These results show



similar patterns as the analyses with Pathd8: (i) most transitions occurred in recent time, and (ii) perkinsids, choanoflagellates, and centrohelids have geologically older transitions. We opted to display the Pathd8 analyses in the main text as TreePl suggests that all transitions in dinoflagellates occurred 100 mya or later (assuming that the clade arose 1 billion years ago<sup>8</sup>). This result is in conflict with studies that have suggested transitions as early as 140 mya<sup>9</sup> and possibly older<sup>10,11</sup>.

## Supplementary Note 1. How many ML trees are enough?

It is important to take phylogenetic uncertainty into account when performing ancestral state reconstruction analyses. We assessed whether 100 ML trees were enough to represent the plausible set of topologies given the dataset. This was done in two ways.

### 1) Robinson-Foulds distance

We calculated relative pairwise Robinson-Foulds (RF) distances in raxml-ng (using the command `--rf-dist`), where an RF-distance of 0 indicates identical topologies, and 1 indicates that no bipartitions are shared. As we had only constrained 60 internal branches out of the possible 16818 branches, the upper bound on the possible pairwise RF-distance of two trees (T1 and T2) was close to 1 (calculation shown below).

$$\begin{aligned} \text{Maximum RF distance} &= \frac{\text{total number of possible unshared bipartitions in T1 and T2}}{\text{total number of bipartitions in both trees}} \\ &= \frac{(16818-60)(2)}{(16818)(2)} = 0.996 \end{aligned}$$

Our calculations showed that the 100 ML trees represented 100 unique topologies with an average relative RF distance of 0.0675, indicating that the trees are topologically very similar on average.

### 2) Bootstrapping test

We performed the auto MRE-based bootstrapping test in raxml-ng using a cutoff value of 0.05 (`--bsconverge --bs-cutoff 0.05`). The algorithm is typically employed to assess how many bootstrap replicates are enough by considering the variance in the tree set<sup>12</sup>. Briefly, the tree set is split into two sub-sets with 1000 permutations, and the weighted RF distance is calculated between the majority-rule consensus trees of the two sub-sets. We performed the auto MRE based bootstrapping test on our set of 100 ML trees and found that convergence was reached after 50 trees.

## Supplementary Note 2. Habitat transition rates in Fungi

### (i) Heterogeneity in fungal transition rates

While our analyses show an extremely high habitat transition rate for fungi (~90 expected transitions per substitution/site), it is important to note that this number hides important variation in the transition rates of different fungal groups. Consistent with previous literature<sup>13,14</sup>, only selected clades had marine representatives (Supp. Note2 Fig 1). These groups include Pezizomycotina (in particular Dothideomycetes, Sordariomycetes), Saccharomycotina, Ustilaginomycotina, and Chytridiomycota. On the other hand, groups like Glomeromycota and Glomeromycotina had few or no marine representatives (Supp. Note2 Fig 2).

When visually inspecting phylogenies, we observed that marine and non-marine sequences in groups such as Pezizomycotina are extremely closely related (with little to no genetic distance between them based on the 18S and 28S genes; Supp. Note2 Fig 1), which is consistent with the high transition rates estimated by our analyses. These results are also consistent with previous literature on the subject<sup>13,14</sup>. For example, the genus *Malassezia*, which is well-known to be linked to skin conditions such as dandruff, is also found in a range of marine habitats, from coral reefs to deep sea vents<sup>15</sup>. In fact, phylogenies of this genus show that marine and non-marine sequences are not monophyletic, but are interspersed within the phylogeny, suggesting multiple transition events within this genus alone. Given that we clustered our sequences at 97% similarity, it is likely that the number of transition events in Fungi (as shown in Figure 2c-d in the manuscript) are underestimates, since we are unable to detect very recent transition events.”

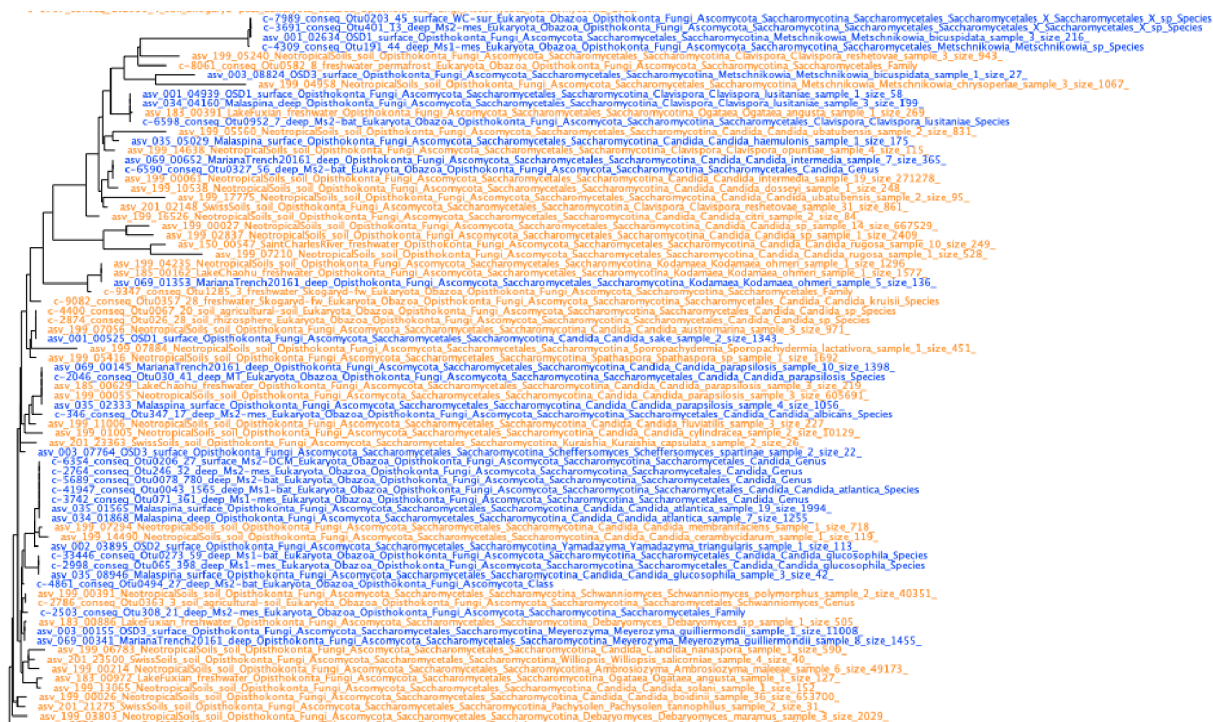

Saccharomycotina

0.4

**Supplementary Note2 Fig 1.** Section of a phylogeny from Saccharomycotina which includes many ascomycete yeast. Taxa in orange are non-marine, while taxa in blue are marine.

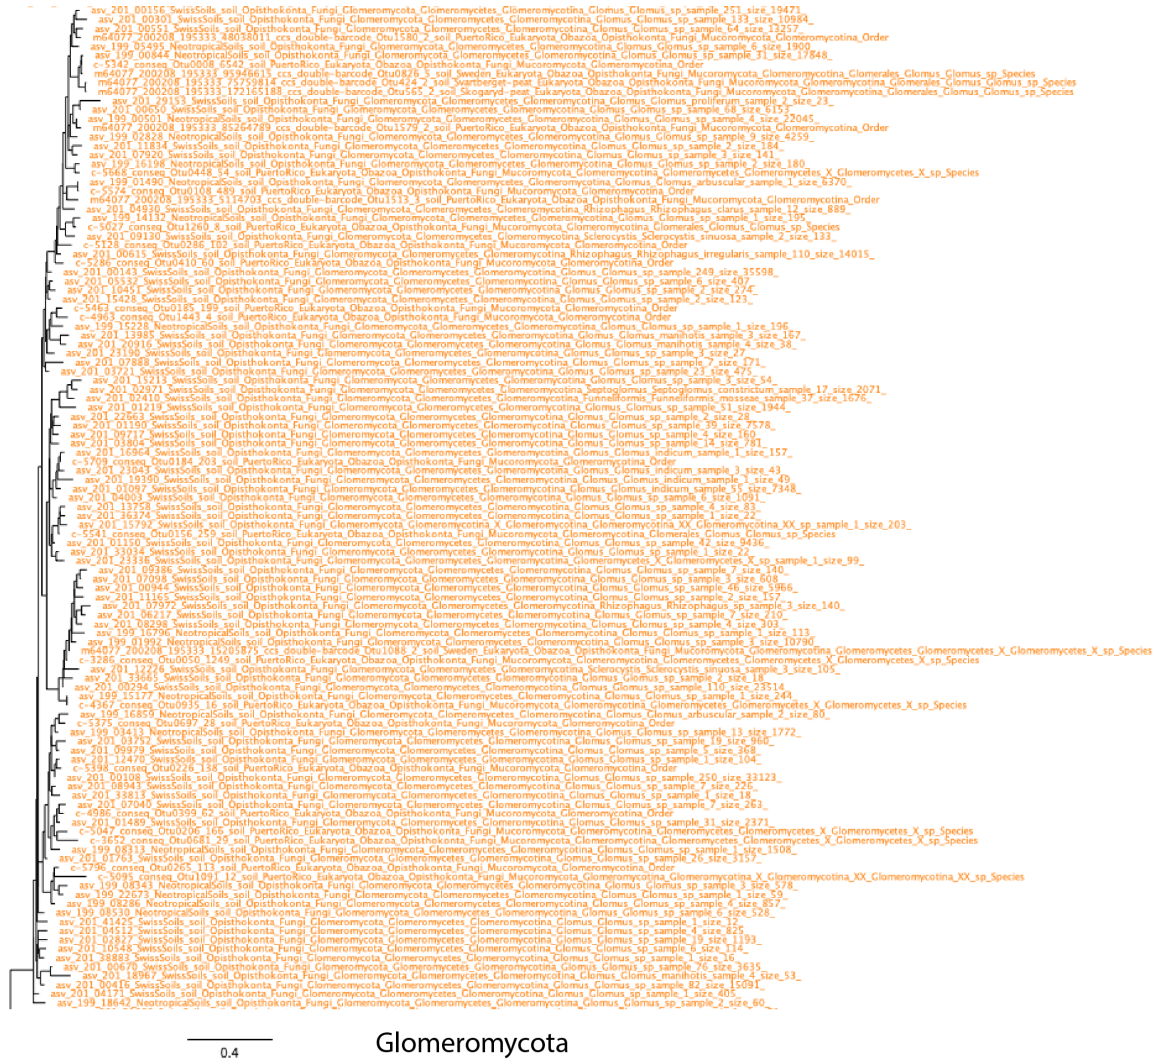

**Supplementary Note2 Fig 2.** Section of a phylogeny of Glomeromycota with non-marine-only taxa.

**(ii) Fungal spores may be able to resist difficult conditions**

Fungal spores may be able to persist in conditions in which the fungus itself is not able to live. For instance, spores of soil fungi may end up in seas, and their DNA can then be picked up in metabarcoding surveys. To assess the possibility that the ubiquity of fungal spores leads to an overestimation of transition rates, we examined how marine OTUs were distributed in our fungal phylogenies, focusing in particular on the short-read OTUs. If fungal spores were indeed ubiquitous, we should see marine OTUs distributed indiscriminately across the fungal phylogeny. However, we observed that 359/414 (i.e. 86%) of marine OTUs belonged to clades previously known to be living in marine water column and sediment samples<sup>13,14</sup> (Supp. Note2 Table 1). This result indicates that fungal spores may not occur as ubiquitously as presumed (and/or our stringent filtering of sequences removes most “contaminants”), and therefore should not influence transition rate analyses so much.

**Supplementary Note2 Table 1.** Distribution of OTUs among fungal clades based on a randomly selected phylogeny of long- and short-read sequences. All clades listed, except the last row, are known to have marine representatives.

|                                                  | Short-read OTUs | Long-read OTUs | All OTUs |
|--------------------------------------------------|-----------------|----------------|----------|
| <b>Agaricomycotina</b>                           | 15              | 17             | 32       |
| <b>Ustilaginomycotina</b>                        | 14              | 21             | 35       |
| <b>Pezizomycotina</b>                            | 32              | 62             | 94       |
| <b>Saccharomycotina</b>                          | 32              | 20             | 52       |
| <b>Puccinomycotina</b>                           | 23              | 21             | 44       |
| <b>Chytridiomycota</b>                           | 78              | 2              | 80       |
| <b>Cryptomycota</b>                              | 18              | 4              | 22       |
| <b>Sequences interspersed among other clades</b> | 46              | 9              | 55       |

**(iii) Evidence indicating that marine fungi are metabolically active**

Several studies provide further evidence indicating that marine fungi are true marine residents, contributing to biogeochemical cycles. First, RNA sequencing of the 18S gene recovers fungi as one of the most dominant groups in marine sediment communities<sup>16,17</sup>, indicating that fungi are metabolically active, and not inactive resting spores. Second, marine fungal communities have been found to be structured by habitat, temperature, salinity, and other environmental factors<sup>18-20</sup>. For instance, saprotrophic fungi have low abundance and diversity in upper marine water column environments (which are often nutrient poor and dominated by free floating or swimming photosynthetic and grazing protists)<sup>14</sup>, but dominate sediments and marine snow particles in the bathypelagic<sup>17,21,22</sup> where they presumably have increased niche availability. On the other hand, chytrids and cryptophytes infecting eukaryotic algae are more dominant in colder, pelagic habitats<sup>23,24</sup>. Third, several studies have shown the role of marine fungi by measuring their extracellular enzyme activity<sup>25</sup>, the amount of carbon they assimilate from phytoplankton<sup>26</sup>, and assessing active metabolic pathways using metatranscriptomics<sup>27,28</sup>.

Altogether, these results indicate that indeed Fungi have the highest habitat transition rates among eukaryotes (although we acknowledge that some marine fungal sequences might be spores sourced from soils/freshwater), which represents an interesting hypothesis to be further tested.

### **Supplementary Note 3. Estimate of ancestral habitats of eukaryotic groups with insufficient PacBio data.**

**Collodictyonids.** *Collodictyon triciliatum* was first isolated and described from freshwater habitats<sup>29–31</sup>. An environmental survey using group specific primers revealed a global distribution that was limited to freshwater environments<sup>32</sup>. No collodictyonid has been found in marine environments, therefore a non-marine origin seems more likely.

**Metamonads.** Mantamonads are gliding flagellates that have thus far only been found in benthic marine habitats<sup>33,34</sup>.

**Pluriformeans.** This group currently consists of two genera: *Corallochytrium* which is a marine organism associated with corals, and *Syssomonas* which is found in freshwater. The ancestral habitat of this group is thus ambiguous<sup>35</sup>.

**Ancoracystids.** The only described organism from this group, *Ancoracysta twista*, was isolated from the surface of a marine coral<sup>36</sup>.

**Glaucophytes.** Almost all glaucophyte algae inhabit freshwater environments, making a non-marine origin more likely<sup>37–39</sup>.

**Rhodophytes.** While several rhodophytes are found in freshwater lakes and even soils, the vast majority of rhodophytes are marine, and ancestral state reconstruction studies indicate a marine origin<sup>38,39</sup>.

**Rhodelphids.** Two species have been described from this group thus far: *Rhodelphis marinus* which was obtained from marine coral sand, and *Rhodelphis limneticus* which was obtained from a freshwater lake<sup>40</sup>. The ancestral habitat of the group is therefore ambiguous.

**Supplementary Table 1.** Collection details of the 21 samples sequenced with PacBio Sequel II for this study. All raw sequencing data can be accessed at ENA under accession PRJEB45931 (this study) and PRJEB25197 (sequenced in <sup>41</sup>). SITES = Swedish Infrastructure for Ecosystem Science. SMHI = Swedish Meteorological and Hydrological Institute.

| No. | Sample code       | Sample type, level 1 | Sample type, level 2 | Sampling date (yyyy-mm-dd) | Sample collected by                  | No. of sites pooled | Country/Region | Sampling Location                            | Comments                                | Size fraction     | Lat   | Long   | Depth       | Reference for samples | Sequencing instrument | No. of demultiplexed reads | No. of processed reads | No. of OTUs |
|-----|-------------------|----------------------|----------------------|----------------------------|--------------------------------------|---------------------|----------------|----------------------------------------------|-----------------------------------------|-------------------|-------|--------|-------------|-----------------------|-----------------------|----------------------------|------------------------|-------------|
| 1   | Erken_fw          | non-marine           | freshwater           | 2019-10-09                 | SITES                                | 1                   | Sweden         | Lake Erken, Erken research station           | Hemi-boreal, agricultural landscape     | 200-0.2 µm        | 59.83 | 18.63  | 0-20 m      | This study            | Sequel II             | 564,504                    | 320,773                | 768         |
| 2   | Skogaryd_fw       | non-marine           | freshwater           | 2019-10-17                 | SITES                                | 1                   | Sweden         | Lake Ersjön, Skogaryd research station       | Hemi-boreal, forest landscape           | 200-0.2 µm        | 58.37 | 12.16  | 0.5, 2, 4 m | This study            | Sequel II             | 699,716                    | 422,836                | 1688        |
| 3   | Svartberget_fw    | non-marine           | freshwater           | 2019-11-05                 | SITES                                | 1                   | Sweden         | Lake Stortjärn, Svartberget research station | Boreal, forest landscape                | 200-0.2 µm        | 64.24 | 19.76  | 0.5, 3.5 m  | This study            | Sequel II             | 627,565                    | 373,152                | 496         |
| 4   | Permafrost_fw     | non-marine           | freshwater           | 2014-08                    | S. Peura, K. Einarsdottir, M. Wauthy | 10                  | Canada         | Nunavik, Quebec                              | Multiple permafrost thaw ponds          | > 0.2 µm          | 55.22 | -77.69 | 0-1.7 m     | <sup>42</sup>         | Sequel II             | 456,683                    | 256,770                | 1324        |
| 5   | Erken_sed_fw      | non-marine           | freshwater           | 2019-10-09                 | SITES                                | 4                   | Sweden         | Lake Erken, Erken research station           | Sediment core of depth 0-5 cm           | No size selection | 59.83 | 18.63  | 0-5 cm      | This study            | Sequel II             | 519,814                    | 337,656                | 1391        |
| 6   | Skogaryd_soil     | non-marine           | soil                 | 2019-10-17                 | SITES                                | 4                   | Sweden         | Skogaryd Mire, Skogaryd research station     | Composite sample from wet and dry areas | No size selection | 58.37 | 12.16  | top soil    | This study            | Sequel II             | 301,806                    | 90,907                 | 593         |
| 7   | Svartberget_soil  | non-marine           | soil                 | 2019-11-05                 | SITES                                | 3                   | Sweden         | Kalkkäls Mire, Svartberget research station  |                                         | No size selection | 64.24 | 19.76  | top soil    | This study            | Sequel II             | 241,901                    | 133,266                | 763         |
| 8   | PuertoRico_soil   | non-marine           | soil                 | 2013-12                    | H. Urbina                            | 6                   | Puerto Rico    | El Yunque, Puerto Rico                       | Montane wet forest                      | No size selection | 18.29 | -65.78 | top soil    | <sup>43</sup>         | Sequel II             | 770,855                    | 384,698                | 441         |
| 9   | Sweden_soil       | non-marine           | soil                 | 2013-10-15                 | H. Urbina                            | 6                   | Sweden         | Ivantjärnsheden field station, Jädraås       | Pine forest                             | No size selection | 60.49 | 16.3   | top soil    | <sup>44</sup>         | Sequel II             | 950,141                    | 519,140                | 1184        |
| 10  | agricultural_soil | non-marine           | soil                 | 2008-03-04                 | P. Gosling, G. Bending               | 14                  | UK             | Set aside arable sites, UK                   | Sequenced in previous study             | No size selection | 51.21 | 1.23   | top soil    | <sup>41</sup>         | Sequel                | 36,339                     | 10,755                 | 595         |
| 11  | rhizosphere_soil  | non-marine           | soil                 | 2015-03                    | S. Hilton                            | 33                  | UK             | 25 commercial farms in the UK                | Sequenced on Sequel I                   | No size selection | 52.2  | -0.81  | top soil    | <sup>41</sup>         | Sequel                | 28,347                     | 9,013                  | 222         |
| 12  | Tibet_soil        | non-marine           | soil                 | 06/08-2011                 | S. Geisen, J. Zhang                  | 9                   | Tibet          | Mix of alpine meadows, shrubs, and forest    | Sequenced in previous study             | No size selection | 29.36 | 94.43  | top soil    | <sup>41</sup>         | Sequel                | 48,676                     | 4,315                  | 183         |
| 13  | WC_sur            | marine               | euphotic             | 2019-08-20                 | SMHI                                 | 1                   | North Sea      | Station Anholt E                             |                                         | 200-0.2 µm        | 56.66 | 12.11  | 5 m         | This study            | Sequel II             | 1,543,739                  | 964,198                | 639         |
| 14  | Ms1_DCM           | marine               | euphotic             | 2011-02-17                 | Malaspina team                       | 2                   | Indian Ocean   | Malaspina station 49                         | DCM layer                               | 3-0.2 µm          | -33.9 | 37     | 85 m        | <sup>45</sup>         | Sequel II             | 273,073                    | 167,358                | 1126        |
| 15  | Ms2_sur           | marine               | euphotic             | 2011-03-25                 | Malaspina team                       | 2                   | Indian Ocean   | Malaspina station 76                         | Surface                                 | 3-0.2 µm          | -40.6 | 142.5  | 3 m         | <sup>45</sup>         | Sequel II             | 149,790                    | 93,932                 | 377         |
| 16  | Ms2_DCM           | marine               | euphotic             | 2011-03-25                 | Malaspina team                       | 2                   | Indian Ocean   | Malaspina station 76                         | DCM layer                               | 20-0.2 µm         | -40.6 | 142.5  | 70 m        | <sup>45</sup>         | Sequel II             | 511,880                    | 272,269                | 754         |
| 17  | Ms1_mes           | marine               | aphotic              | 2011-02-17                 | Malaspina team                       | 2                   | Indian Ocean   | Malaspina station 49                         | Mesopelagic                             | 3-0.2 µm          | -33.9 | 37     | 800 m       | <sup>45</sup>         | Sequel II             | 642,804                    | 243,523                | 540         |
| 18  | Ms2_mes           | marine               | aphotic              | 2011-03-25                 | Malaspina team                       | 2                   | Indian Ocean   | Malaspina station 76                         | Mesopelagic                             | 20-0.2 µm         | -40.6 | 142.5  | 275 m       | <sup>45</sup>         | Sequel II             | 656,429                    | 415,020                | 637         |
| 19  | Ms1_bat           | marine               | aphotic              | 2011-02-17                 | Malaspina team                       | 2                   | Indian Ocean   | Malaspina station 49                         | Bathypelagic                            | 20-0.2 µm         | -33.9 | 37     | 1200 m      | <sup>45</sup>         | Sequel II             | 761,055                    | 422,088                | 1554        |
| 20  | Ms2_bat           | marine               | aphotic              | 2011-03-25                 | Malaspina team                       | 2                   | Indian Ocean   | Malaspina station 76                         | Bathypelagic                            | 20-0.2 µm         | -40.6 | 142.5  | 2800-3300 m | <sup>45</sup>         | Sequel II             | 775,615                    | 483,155                | 1196        |
| 21  | MT                | marine               | aphotic              | 2016-06                    | H. Jing, pilots of Jiao Long Hao     | 1                   | Pacific Ocean  | Mariana Trench                               | Bathypelagic                            | 3-0.2 µm          | 11.18 | 141.98 | 5900 m      | <sup>17</sup>         | Sequel II             | 162,569                    | 84,921                 | 99          |

**Supplementary Table 2.** The first five ranks of the PR2-transitions database<sup>46</sup> (upto the class rank; see Materials and Methods for details on how the PR2 database was adapted for this study), and whether corresponding ribosomal DNA sequences were recovered by PacBio sequencing.

| Domain    | Supergroup     | Division    | Subdivision   | Class                | Sequenced by PacBio |
|-----------|----------------|-------------|---------------|----------------------|---------------------|
| Eukaryota | Amoebozoa      | Amoebozoa_X | Amoebozoa_XX  | Amoebozoa_XXX        | Yes                 |
| Eukaryota | Amoebozoa      | Amoebozoa_X | Amoebozoa_XX  | Lobosa-G1            | Yes                 |
| Eukaryota | Amoebozoa      | Discosea    | Discosea_X    | Centramoebia         | Yes                 |
| Eukaryota | Amoebozoa      | Discosea    | Discosea_X    | Flabellinia          | Yes                 |
| Eukaryota | Amoebozoa      | Discosea    | Discosea_X    | Stygamoebida         | Yes                 |
| Eukaryota | Amoebozoa      | Evosea      | Evosea_X      | Archamoebae          | Yes                 |
| Eukaryota | Amoebozoa      | Evosea      | Evosea_X      | Eumycetozoa          | Yes                 |
| Eukaryota | Amoebozoa      | Evosea      | Evosea_X      | Variosea             | Yes                 |
| Eukaryota | Amoebozoa      | Tubulinea   | Tubulinea_X   | Corycida             | -                   |
| Eukaryota | Amoebozoa      | Tubulinea   | Tubulinea_X   | Echinamoebida        | Yes                 |
| Eukaryota | Amoebozoa      | Tubulinea   | Tubulinea_X   | Elardia              | Yes                 |
| Eukaryota | Amoebozoa      | Tubulinea   | Tubulinea_X   | Tubulinea_XX         | Yes                 |
| Eukaryota | Archaeplastida | Chlorophyta | Chlorophyta_X | Chlorodendrophyceae  | Yes                 |
| Eukaryota | Archaeplastida | Chlorophyta | Chlorophyta_X | Chlorophyceae        | Yes                 |
| Eukaryota | Archaeplastida | Chlorophyta | Chlorophyta_X | Chlorophyta_XX       | Yes                 |
| Eukaryota | Archaeplastida | Chlorophyta | Chlorophyta_X | Chloropicophyceae    | Yes                 |
| Eukaryota | Archaeplastida | Chlorophyta | Chlorophyta_X | Mamiellophyceae      | Yes                 |
| Eukaryota | Archaeplastida | Chlorophyta | Chlorophyta_X | Nephroselmidophyceae | -                   |
| Eukaryota | Archaeplastida | Chlorophyta | Chlorophyta_X | Palmophyllophyceae   | Yes                 |
| Eukaryota | Archaeplastida | Chlorophyta | Chlorophyta_X | Pedinophyceae        | Yes                 |
| Eukaryota | Archaeplastida | Chlorophyta | Chlorophyta_X | Picocystophyceae     | -                   |
| Eukaryota | Archaeplastida | Chlorophyta | Chlorophyta_X | Prasino-Clade-9      | Yes                 |
| Eukaryota | Archaeplastida | Chlorophyta | Chlorophyta_X | Prasino-Clade-VIII   | -                   |
| Eukaryota | Archaeplastida | Chlorophyta | Chlorophyta_X | Prasino-Clade-V      | Yes                 |
| Eukaryota | Archaeplastida | Chlorophyta | Chlorophyta_X | Pyramimonadophyceae  | Yes                 |
| Eukaryota | Archaeplastida | Chlorophyta | Chlorophyta_X | Trebouxiophyceae     | Yes                 |
| Eukaryota | Archaeplastida | Chlorophyta | Chlorophyta_X | Ulvophyceae          | Yes                 |
| Eukaryota | Archaeplastida | Glaucophyta | Glaucophyta_X | Glaucocystophyceae   | Yes                 |
| Eukaryota | Archaeplastida | Rhodelphea  | Rhodelphea_X  | Rhodelpheida         | Yes                 |
| Eukaryota | Archaeplastida | Rhodophyta  | Rhodophyta_X  | Bangiophyceae        | Yes                 |
| Eukaryota | Archaeplastida | Rhodophyta  | Rhodophyta_X  | Compsopogonophyceae  | -                   |



| Domain    | Supergroup     | Division           | Subdivision         | Class                 | Sequenced by PacBio |
|-----------|----------------|--------------------|---------------------|-----------------------|---------------------|
| Eukaryota | Archaeplastida | Rhodophyta         | Rhodophyta_X        | Florideophyceae       | -                   |
| Eukaryota | Archaeplastida | Rhodophyta         | Rhodophyta_X        | Porphyridiophyceae    | -                   |
| Eukaryota | Archaeplastida | Rhodophyta         | Rhodophyta_X        | Rhodellophyceae       | -                   |
| Eukaryota | Archaeplastida | Rhodophyta         | Rhodophyta_X        | Rhodophyta_XX         | -                   |
| Eukaryota | Archaeplastida | Rhodophyta         | Rhodophyta_X        | Stylonematophyceae    | -                   |
| Eukaryota | Archaeplastida | Streptophyta       | Streptophyta_X      | Charophyceae          | -                   |
| Eukaryota | Archaeplastida | Streptophyta       | Streptophyta_X      | Coleochaetophyceae    | -                   |
| Eukaryota | Archaeplastida | Streptophyta       | Streptophyta_X      | Embryophyceae         | Yes                 |
| Eukaryota | Archaeplastida | Streptophyta       | Streptophyta_X      | Klebsormidiophyceae   | Yes                 |
| Eukaryota | Archaeplastida | Streptophyta       | Streptophyta_X      | Mesostigmatophyceae   | -                   |
| Eukaryota | Archaeplastida | Streptophyta       | Streptophyta_X      | Streptophyta_XX       | Yes                 |
| Eukaryota | Archaeplastida | Streptophyta       | Streptophyta_X      | Zygnemophyceae        | Yes                 |
| Eukaryota | CRuMs          | Collodictyonidae   | Collodictyonidae_X  | Collodictyonidae_XX   | -                   |
| Eukaryota | CRuMs          | Mantamonadidea     | Mantamonadidea_X    | Mantamonadida         | -                   |
| Eukaryota | CRuMs          | Rigifilida         | Rigifilida_X        | Rigifilida_XX         | Yes                 |
| Eukaryota | Cryptista      | Cryptista_X        | Cryptista_XX        | Cryptista_XXX         | -                   |
| Eukaryota | Cryptista      | Cryptophyta        | Cryptophyta_X       | Cryptophyceae         | Yes                 |
| Eukaryota | Cryptista      | Kathablepharidacea | Kathablepharida     | Kathablepharidea      | Yes                 |
| Eukaryota | Eukaryota_X    | Ancoracystida      | Ancoracystida_X     | Ancoracystida_XX      | -                   |
| Eukaryota | Eukaryota_X    | Ancyromonadida     | Ancyromonadida_X    | Ancyromonadida_XX     | Yes                 |
| Eukaryota | Eukaryota_X    | Hemimastigophora   | Hemimastigophora_X  | Hemimastigophora_XX   | Yes                 |
| Eukaryota | Eukaryota_X    | Picozoa            | Picozoa_X           | Picozoa_XX            | Yes                 |
| Eukaryota | Excavata       | Discoba            | Discoba_X           | Euglenozoa            | Yes                 |
| Eukaryota | Excavata       | Discoba            | Discoba_X           | Heterolobosea         | Yes                 |
| Eukaryota | Excavata       | Discoba            | Discoba_X           | Jakobida              | Yes                 |
| Eukaryota | Excavata       | Discoba            | Discoba_X           | Tsukubamonadidae      | -                   |
| Eukaryota | Excavata       | Malawimonadidae    | Malawimonadidae_X   | Malawimonadidae_XX    | Yes                 |
| Eukaryota | Excavata       | Metamonada         | Metamonada_X        | Fornicata             | Yes                 |
| Eukaryota | Excavata       | Metamonada         | Metamonada_X        | Parabasalia           | -                   |
| Eukaryota | Excavata       | Metamonada         | Metamonada_X        | Preaxostyla           | Yes                 |
| Eukaryota | Haptista       | Centroplasthelida  | Centroplasthelida_X | Centroplasthelida_XX  | Yes                 |
| Eukaryota | Haptista       | Centroplasthelida  | Centroplasthelida_X | Panacanthocystida     | Yes                 |
| Eukaryota | Haptista       | Centroplasthelida  | Centroplasthelida_X | Pterocystida          | Yes                 |
| Eukaryota | Haptista       | Haptophyta         | Haptophyta_X        | Haptophyta_Clade_HAP1 | -                   |

| Domain    | Supergroup | Division     | Subdivision      | Class                 | Sequenced by PacBio |
|-----------|------------|--------------|------------------|-----------------------|---------------------|
| Eukaryota | Haptista   | Haptophyta   | Haptophyta_X     | Haptophyta_Clade_HAP2 | Yes                 |
| Eukaryota | Haptista   | Haptophyta   | Haptophyta_X     | Haptophyta_Clade_HAP3 | Yes                 |
| Eukaryota | Haptista   | Haptophyta   | Haptophyta_X     | Haptophyta_Clade_HAP4 | Yes                 |
| Eukaryota | Haptista   | Haptophyta   | Haptophyta_X     | Haptophyta_Clade_HAP5 | -                   |
| Eukaryota | Haptista   | Haptophyta   | Haptophyta_X     | Haptophyta_XX         | Yes                 |
| Eukaryota | Haptista   | Haptophyta   | Haptophyta_X     | Pavlovophyceae        | Yes                 |
| Eukaryota | Haptista   | Haptophyta   | Haptophyta_X     | Prymnesiophyceae      | Yes                 |
| Eukaryota | Obazoa     | Apusomonada  | Apusomonada_X    | Apusomonadidae        | Yes                 |
| Eukaryota | Obazoa     | Breviatea    | Breviatea_X      | Breviatea_XX          | Yes                 |
| Eukaryota | Obazoa     | Breviatea    | Breviatea_X      | NAMAKO-1-lineage      | -                   |
| Eukaryota | Obazoa     | Breviatea    | Breviatea_X      | YS16Ec34-lineage      | -                   |
| Eukaryota | Obazoa     | Opisthokonta | Choanoflagellata | Choanoflagellata_X    | Yes                 |
| Eukaryota | Obazoa     | Opisthokonta | Filasterea       | Filasterea_X          | Yes                 |
| Eukaryota | Obazoa     | Opisthokonta | Fungi            | Ascomycota            | Yes                 |
| Eukaryota | Obazoa     | Opisthokonta | Fungi            | Basidiomycota         | Yes                 |
| Eukaryota | Obazoa     | Opisthokonta | Fungi            | Blastocladiomycota    | Yes                 |
| Eukaryota | Obazoa     | Opisthokonta | Fungi            | Chytridiomycota       | Yes                 |
| Eukaryota | Obazoa     | Opisthokonta | Fungi            | Fungi_X               | Yes                 |
| Eukaryota | Obazoa     | Opisthokonta | Fungi            | Monoblepharidomycetes | Yes                 |
| Eukaryota | Obazoa     | Opisthokonta | Fungi            | Mucoromycota          | Yes                 |
| Eukaryota | Obazoa     | Opisthokonta | Fungi            | Neocallimastigaceae   | -                   |
| Eukaryota | Obazoa     | Opisthokonta | Fungi            | Olpidium_class        | -                   |
| Eukaryota | Obazoa     | Opisthokonta | Fungi            | Opisthosporidia       | Yes                 |
| Eukaryota | Obazoa     | Opisthokonta | Fungi            | Zoopagomycota         | Yes                 |
| Eukaryota | Obazoa     | Opisthokonta | Ichthyosporea    | Dermocystida          | Yes                 |
| Eukaryota | Obazoa     | Opisthokonta | Ichthyosporea    | Ichthyophonida        | Yes                 |
| Eukaryota | Obazoa     | Opisthokonta | Ichthyosporea    | Ichthyosponida        | Yes                 |
| Eukaryota | Obazoa     | Opisthokonta | Metazoa          | Acanthocephala        | Yes                 |
| Eukaryota | Obazoa     | Opisthokonta | Metazoa          | Annelida              | Yes                 |
| Eukaryota | Obazoa     | Opisthokonta | Metazoa          | Arthropoda            | Yes                 |
| Eukaryota | Obazoa     | Opisthokonta | Metazoa          | Brachiopoda           | Yes                 |
| Eukaryota | Obazoa     | Opisthokonta | Metazoa          | Bryozoa               | Yes                 |
| Eukaryota | Obazoa     | Opisthokonta | Metazoa          | Cephalochordata       | -                   |
| Eukaryota | Obazoa     | Opisthokonta | Metazoa          | Chaetognatha          | Yes                 |

| Domain    | Supergroup | Division     | Subdivision    | Class           | Sequenced by PacBio |
|-----------|------------|--------------|----------------|-----------------|---------------------|
| Eukaryota | Obazoa     | Opisthokonta | Metazoa        | Cnidaria        | Yes                 |
| Eukaryota | Obazoa     | Opisthokonta | Metazoa        | Craniata        | -                   |
| Eukaryota | Obazoa     | Opisthokonta | Metazoa        | Ctenophora      | Yes                 |
| Eukaryota | Obazoa     | Opisthokonta | Metazoa        | Cycliophora     | -                   |
| Eukaryota | Obazoa     | Opisthokonta | Metazoa        | Echinodermata   | Yes                 |
| Eukaryota | Obazoa     | Opisthokonta | Metazoa        | Entoprocta      | -                   |
| Eukaryota | Obazoa     | Opisthokonta | Metazoa        | Gastrotricha    | Yes                 |
| Eukaryota | Obazoa     | Opisthokonta | Metazoa        | Gnathostomulida | -                   |
| Eukaryota | Obazoa     | Opisthokonta | Metazoa        | Hemichordata    | -                   |
| Eukaryota | Obazoa     | Opisthokonta | Metazoa        | Kinorhyncha     | -                   |
| Eukaryota | Obazoa     | Opisthokonta | Metazoa        | Loricifera      | -                   |
| Eukaryota | Obazoa     | Opisthokonta | Metazoa        | Mesozoa         | -                   |
| Eukaryota | Obazoa     | Opisthokonta | Metazoa        | Metazoa_X       | -                   |
| Eukaryota | Obazoa     | Opisthokonta | Metazoa        | Micrognathozoa  | -                   |
| Eukaryota | Obazoa     | Opisthokonta | Metazoa        | Mollusca        | Yes                 |
| Eukaryota | Obazoa     | Opisthokonta | Metazoa        | Myxozoa         | Yes                 |
| Eukaryota | Obazoa     | Opisthokonta | Metazoa        | Myzostomida     | -                   |
| Eukaryota | Obazoa     | Opisthokonta | Metazoa        | Nematoda        | Yes                 |
| Eukaryota | Obazoa     | Opisthokonta | Metazoa        | Nematomorpha    | Yes                 |
| Eukaryota | Obazoa     | Opisthokonta | Metazoa        | Nemertea        | -                   |
| Eukaryota | Obazoa     | Opisthokonta | Metazoa        | Onychophora     | -                   |
| Eukaryota | Obazoa     | Opisthokonta | Metazoa        | Placozoa        | -                   |
| Eukaryota | Obazoa     | Opisthokonta | Metazoa        | Platyhelminthes | Yes                 |
| Eukaryota | Obazoa     | Opisthokonta | Metazoa        | Porifera        | -                   |
| Eukaryota | Obazoa     | Opisthokonta | Metazoa        | Priapulida      | -                   |
| Eukaryota | Obazoa     | Opisthokonta | Metazoa        | Rotifera        | Yes                 |
| Eukaryota | Obazoa     | Opisthokonta | Metazoa        | Tardigrada      | Yes                 |
| Eukaryota | Obazoa     | Opisthokonta | Metazoa        | Urochordata     | Yes                 |
| Eukaryota | Obazoa     | Opisthokonta | Metazoa        | Xenoturbellida  | -                   |
| Eukaryota | Obazoa     | Opisthokonta | Opisthokonta_X | Opisthokonta_XX | Yes                 |
| Eukaryota | Obazoa     | Opisthokonta | Pluriformea    | Corallochytraea | -                   |
| Eukaryota | Obazoa     | Opisthokonta | Pluriformea    | Pluriformea_X   | Yes                 |
| Eukaryota | Obazoa     | Opisthokonta | Rotosphaerida  | Fonticulea      | -                   |
| Eukaryota | Obazoa     | Opisthokonta | Rotosphaerida  | Nucleariidea    | Yes                 |

| Domain    | Supergroup | Division  | Subdivision    | Class                       | Sequenced by PacBio |
|-----------|------------|-----------|----------------|-----------------------------|---------------------|
| Eukaryota | TSAR       | Alveolata | Alveolata_X    | Alveolata_XX                | -                   |
| Eukaryota | TSAR       | Alveolata | Apicomplexa    | Apicomplexa_X               | Yes                 |
| Eukaryota | TSAR       | Alveolata | Apicomplexa    | Coccidiomorpha              | Yes                 |
| Eukaryota | TSAR       | Alveolata | Apicomplexa    | Colpodellidea               | Yes                 |
| Eukaryota | TSAR       | Alveolata | Apicomplexa    | Gregarinomorpha             | Yes                 |
| Eukaryota | TSAR       | Alveolata | Ciliophora     | Armophorea                  | Yes                 |
| Eukaryota | TSAR       | Alveolata | Ciliophora     | Cariacotrichea              | -                   |
| Eukaryota | TSAR       | Alveolata | Ciliophora     | Ciliophora_X                | Yes                 |
| Eukaryota | TSAR       | Alveolata | Ciliophora     | Colpodea                    | Yes                 |
| Eukaryota | TSAR       | Alveolata | Ciliophora     | CONTH_1                     | -                   |
| Eukaryota | TSAR       | Alveolata | Ciliophora     | CONTH_2                     | Yes                 |
| Eukaryota | TSAR       | Alveolata | Ciliophora     | CONTH_3                     | -                   |
| Eukaryota | TSAR       | Alveolata | Ciliophora     | CONTH_4                     | Yes                 |
| Eukaryota | TSAR       | Alveolata | Ciliophora     | CONTH_5                     | Yes                 |
| Eukaryota | TSAR       | Alveolata | Ciliophora     | CONTH_6                     | -                   |
| Eukaryota | TSAR       | Alveolata | Ciliophora     | CONTH_7                     | Yes                 |
| Eukaryota | TSAR       | Alveolata | Ciliophora     | CONTH_8                     | -                   |
| Eukaryota | TSAR       | Alveolata | Ciliophora     | CONThreeP                   | Yes                 |
| Eukaryota | TSAR       | Alveolata | Ciliophora     | Cyclotrichium_like_organism | -                   |
| Eukaryota | TSAR       | Alveolata | Ciliophora     | Heterotrichea               | Yes                 |
| Eukaryota | TSAR       | Alveolata | Ciliophora     | Karyorelictea               | -                   |
| Eukaryota | TSAR       | Alveolata | Ciliophora     | Litostomatea                | Yes                 |
| Eukaryota | TSAR       | Alveolata | Ciliophora     | Nassophorea                 | Yes                 |
| Eukaryota | TSAR       | Alveolata | Ciliophora     | Oligohymenophorea           | Yes                 |
| Eukaryota | TSAR       | Alveolata | Ciliophora     | Phyllopharyngea             | Yes                 |
| Eukaryota | TSAR       | Alveolata | Ciliophora     | Plagiopylea                 | Yes                 |
| Eukaryota | TSAR       | Alveolata | Ciliophora     | Prostomatea_1               | Yes                 |
| Eukaryota | TSAR       | Alveolata | Ciliophora     | Prostomatea_2               | Yes                 |
| Eukaryota | TSAR       | Alveolata | Ciliophora     | Prostomatea_3               | Yes                 |
| Eukaryota | TSAR       | Alveolata | Ciliophora     | Spirotrichea                | Yes                 |
| Eukaryota | TSAR       | Alveolata | Colponemidia   | Colponemidia_X              | -                   |
| Eukaryota | TSAR       | Alveolata | Dinoflagellata | Dinophyceae                 | Yes                 |
| Eukaryota | TSAR       | Alveolata | Dinoflagellata | Dinophyta_X                 | Yes                 |
| Eukaryota | TSAR       | Alveolata | Dinoflagellata | Noctilucopephyceae          | -                   |

| Domain    | Supergroup | Division      | Subdivision    | Class                 | Sequenced by PacBio |
|-----------|------------|---------------|----------------|-----------------------|---------------------|
| Eukaryota | TSAR       | Alveolata     | Dinoflagellata | Oxyrrhea              | -                   |
| Eukaryota | TSAR       | Alveolata     | Dinoflagellata | Syndiniales           | Yes                 |
| Eukaryota | TSAR       | Alveolata     | Perkinsea      | Perkinsea_X           | -                   |
| Eukaryota | TSAR       | Alveolata     | Perkinsea      | Perkinsida            | Yes                 |
| Eukaryota | TSAR       | Rhizaria      | Cercozoa       | Cercozoa_X            | -                   |
| Eukaryota | TSAR       | Rhizaria      | Cercozoa       | Chlorarachniophyceae  | Yes                 |
| Eukaryota | TSAR       | Rhizaria      | Cercozoa       | Endomyxa-Ascetosporea | Yes                 |
| Eukaryota | TSAR       | Rhizaria      | Cercozoa       | Endomyxa              | Yes                 |
| Eukaryota | TSAR       | Rhizaria      | Cercozoa       | Endomyxa-Gromiidea    | Yes                 |
| Eukaryota | TSAR       | Rhizaria      | Cercozoa       | Endomyxa-Phytomyxea   | Yes                 |
| Eukaryota | TSAR       | Rhizaria      | Cercozoa       | Endomyxa              | Yes                 |
| Eukaryota | TSAR       | Rhizaria      | Cercozoa       | Filosa                | Yes                 |
| Eukaryota | TSAR       | Rhizaria      | Cercozoa       | Filosa-Granifilosea   | Yes                 |
| Eukaryota | TSAR       | Rhizaria      | Cercozoa       | Filosa-Imbricatea     | Yes                 |
| Eukaryota | TSAR       | Rhizaria      | Cercozoa       | Filosa-Metromonadea   | -                   |
| Eukaryota | TSAR       | Rhizaria      | Cercozoa       | Filosa-Sarcomonadea   | Yes                 |
| Eukaryota | TSAR       | Rhizaria      | Cercozoa       | Filosa-Thecofilosea   | Yes                 |
| Eukaryota | TSAR       | Rhizaria      | Cercozoa       | Novel-clade-10-12     | Yes                 |
| Eukaryota | TSAR       | Rhizaria      | Cercozoa       | Phaeodarea            | Yes                 |
| Eukaryota | TSAR       | Rhizaria      | Foraminifera   | Foraminifera_X        | -                   |
| Eukaryota | TSAR       | Rhizaria      | Foraminifera   | Globothalamea         | Yes                 |
| Eukaryota | TSAR       | Rhizaria      | Foraminifera   | Monothalamids         | Yes                 |
| Eukaryota | TSAR       | Rhizaria      | Foraminifera   | Tubothalamea          | Yes                 |
| Eukaryota | TSAR       | Rhizaria      | Radiolaria     | Acantharea            | Yes                 |
| Eukaryota | TSAR       | Rhizaria      | Radiolaria     | Polycystinea          | Yes                 |
| Eukaryota | TSAR       | Rhizaria      | Radiolaria     | RAD-A                 | Yes                 |
| Eukaryota | TSAR       | Rhizaria      | Radiolaria     | RAD-B                 | Yes                 |
| Eukaryota | TSAR       | Rhizaria      | Radiolaria     | RAD-C                 | Yes                 |
| Eukaryota | TSAR       | Rhizaria      | Radiolaria     | Radiolaria_X          | Yes                 |
| Eukaryota | TSAR       | Stramenopiles | Bigyra         | Bigyra_X              | -                   |
| Eukaryota | TSAR       | Stramenopiles | Bigyra         | Opalozoa              | Yes                 |
| Eukaryota | TSAR       | Stramenopiles | Bigyra         | Sagenista             | Yes                 |
| Eukaryota | TSAR       | Stramenopiles | Gyrista        | Aurearenophyceae      | -                   |
| Eukaryota | TSAR       | Stramenopiles | Gyrista        | Bolidophyceae         | Yes                 |

| Domain    | Supergroup | Division      | Subdivision     | Class                 | Sequenced by PacBio |
|-----------|------------|---------------|-----------------|-----------------------|---------------------|
| Eukaryota | TSAR       | Stramenopiles | Gyrista         | Chrysisia             | Yes                 |
| Eukaryota | TSAR       | Stramenopiles | Gyrista         | Chrysomerophyceae     | -                   |
| Eukaryota | TSAR       | Stramenopiles | Gyrista         | Chrysophyceae         | Yes                 |
| Eukaryota | TSAR       | Stramenopiles | Gyrista         | Developea             | -                   |
| Eukaryota | TSAR       | Stramenopiles | Gyrista         | Diatomeae             | Yes                 |
| Eukaryota | TSAR       | Stramenopiles | Gyrista         | Dictyochophyceae      | Yes                 |
| Eukaryota | TSAR       | Stramenopiles | Gyrista         | Eustigmatophyceae     | Yes                 |
| Eukaryota | TSAR       | Stramenopiles | Gyrista         | Gyrista_X             | Yes                 |
| Eukaryota | TSAR       | Stramenopiles | Gyrista         | Hyphochytriomyceta    | Yes                 |
| Eukaryota | TSAR       | Stramenopiles | Gyrista         | MOCH-1                | -                   |
| Eukaryota | TSAR       | Stramenopiles | Gyrista         | MOCH-2                | Yes                 |
| Eukaryota | TSAR       | Stramenopiles | Gyrista         | MOCH-4                | Yes                 |
| Eukaryota | TSAR       | Stramenopiles | Gyrista         | Pelagophyceae         | Yes                 |
| Eukaryota | TSAR       | Stramenopiles | Gyrista         | Peronosporomycetes    | Yes                 |
| Eukaryota | TSAR       | Stramenopiles | Gyrista         | Phaeophyceae          | Yes                 |
| Eukaryota | TSAR       | Stramenopiles | Gyrista         | Phaeothamniophyceae   | -                   |
| Eukaryota | TSAR       | Stramenopiles | Gyrista         | Picophagea            | -                   |
| Eukaryota | TSAR       | Stramenopiles | Gyrista         | Pinguiphyceae         | -                   |
| Eukaryota | TSAR       | Stramenopiles | Gyrista         | Pirsoniales           | Yes                 |
| Eukaryota | TSAR       | Stramenopiles | Gyrista         | Raphidophyceae        | Yes                 |
| Eukaryota | TSAR       | Stramenopiles | Gyrista         | Schizocladiphyceae    | -                   |
| Eukaryota | TSAR       | Stramenopiles | Gyrista         | Synchromophyceae      | -                   |
| Eukaryota | TSAR       | Stramenopiles | Gyrista         | Xanthophyceae         | Yes                 |
| Eukaryota | TSAR       | Stramenopiles | Stramenopiles_X | Stramenopiles-Group-2 | -                   |
| Eukaryota | TSAR       | Stramenopiles | Stramenopiles_X | Stramenopiles-Group-3 | Yes                 |
| Eukaryota | TSAR       | Stramenopiles | Stramenopiles_X | Stramenopiles-Group-4 | -                   |
| Eukaryota | TSAR       | Stramenopiles | Stramenopiles_X | Stramenopiles-Group-6 | -                   |
| Eukaryota | TSAR       | Stramenopiles | Stramenopiles_X | Stramenopiles-Group-7 | -                   |
| Eukaryota | TSAR       | Stramenopiles | Stramenopiles_X | Stramenopiles-Group-8 | -                   |
| Eukaryota | TSAR       | Stramenopiles | Stramenopiles_X | Stramenopiles-Group-9 | Yes                 |
| Eukaryota | TSAR       | Stramenopiles | Stramenopiles_X | Stramenopiles_XX      | Yes                 |
| Eukaryota | TSAR       | Telonemia     | Telonemia_X     | Telonemia_XX          | Yes                 |

**Supplementary Table 3.** Details of the short-read metabarcoding datasets used in this study. ID refers to the dataset ID in metaPR2<sup>47</sup>. Number of ASVs is obtained after processing the raw reads with DADA2<sup>48</sup>.

| No. | ID  | Dataset name         | Ref | Env level 1 | Env level 2        | Description              | Location                 | No. of samples | Sampling date | Sequencing technology | Fwd primer    | Rev primer      | Primer set in PR <sup>2</sup> primer database <sup>5</sup> | Number of ASVs | Bioproject             | Repo  |
|-----|-----|----------------------|-----|-------------|--------------------|--------------------------|--------------------------|----------------|---------------|-----------------------|---------------|-----------------|------------------------------------------------------------|----------------|------------------------|-------|
| 1   | 1   | Ocean Sampling Day   | 49  | marine      | euphotic           | global coastal waters    | global                   | 155            | 2014-06-21    | Illumina              | TAREuk454FWD1 | V4 18S Next.Rev | 16                                                         | 12451          | PRJEB8682              | ENA   |
| 2   | 2   | Ocean Sampling Day   | 49  | marine      | euphotic           | global coastal waters    | global                   | 138            | 2015-06-21    | Illumina              | TAREuk454FWD1 | V4 18S Next.Rev | 16                                                         | 11083          | PRJEB8682              | ENA   |
| 3   | 3   | Ocean Sampling Day   | 49  | marine      | euphotic           | global coastal waters    | global                   | 29             | 2014-06-21    | Illumina              | TAREuk454FWD1 | V4 18S Next.Rev | 16                                                         | 13405          | PRJEB8682              | ENA   |
| 4   | 34  | Malaspina Expedition | 45  | marine      | euphotic + aphotic | global marine waters     | global                   | 56 + 124       | 2010-2011     | Illumina              | TAREuk454FWD1 | TAREukREV3      | 8                                                          | 17656          | PRJEB23771             | ENA   |
| 5   | 35  | Malaspina Expedition | 50  | marine      | euphotic           | global marine waters     | global                   | 119            | 2010-2011     | Illumina              | TAREuk454FWD1 | TAREukREV3      | 8                                                          | 15338          | PRJEB23913             | ENA   |
| 6   | 53  | Biomarks             | 51  | marine      | euphotic           | European coastal waters  | coast of Europe          | 50             | 2010-2011     | 454                   | TAREuk454FWD1 | TAREukREV3      | 8                                                          | 9097           | PRJEB9133              | NCBI  |
| 7   | 69  | Mariana Trench 1     | 17  | marine      | aphotic            | deep sea trench          | Mariana Trench           | 32             | 2016          | Illumina              | TAREuk454FWD1 | TAREukREV3      | 8                                                          | 5842           | SRP141405              | NCBI  |
| 8   | 70  | Mariana Trench 2     | 52  | marine      | aphotic            | deep sea trench          | Mariana Trench           | 12             | 2016          | Illumina              | 3NDF          | V4_euk_R2       | 14                                                         | 1115           | PRJNA399026            | NCBI  |
| 9   | 150 | Saint-Charles River  | 53  | non-marine  | freshwater         | river                    | Canada                   | 144            | 2016-2017     | Illumina              | E572F         | E1009R          | 17                                                         | 5584           | PRJEB36925             | NCBI  |
| 10  | 183 | Lake Fuxian          | 54  | non-marine  | freshwater         | lake                     | China                    | 21             | 2015          | Illumina              | NSF573        | NSR951          | 25                                                         | 3224           | PRJNA534173            | NCBI  |
| 11  | 185 | Lake Chaohu          | 55  | non-marine  | freshwater         | lake                     | China                    | 25             | 2014-2015     | Illumina              | NSF573        | NSR951          | 25                                                         | 1733           | PRJNA330896            | NCBI  |
| 12  | 195 | Lake Baikal          | 56  | non-marine  | freshwater         | lake                     | Siberia                  | 23             | 2013          | Illumina              | TAREukFWD1    | TAREukREV3      | 154                                                        | 1125           | PRJEB24415             | ENA   |
| 13  | 196 | Chevreuse            | 57  | non-marine  | freshwater         | ponds                    | France                   | 12             | 2012          | 454                   | EK-565F       | EUK1134-R       | 24                                                         | 807            | PRJNA259710            | NCBI  |
| 14  | 197 | Mountain Lakes       | 58  | non-marine  | freshwater         | high-altitude lakes      | Austria, Chile, Ethiopia | 19             | 2013          | Illumina              | TAREuk454FWD1 | TAREukREV3      | 8                                                          | 25935          | SRP065150              | NCBI  |
| 15  | 198 | Lake Garda           | 59  | non-marine  | freshwater         | alpine lake              | Italy                    | 64             | 2014-2015     | Illumina              | TAREuk454FWD1 | V4 18S Next.Rev | 16                                                         | 1173           | PRJEB36925             | ENA   |
| 16  | 199 | Neotropical Soils    | 60  | non-marine  | soil               | Neotropical forest soils | Central + South America  | 154            | 2012-2013     | Illumina              | TAREuk454FWD1 | TAREukREV3      | 8                                                          | 28474          | PRJNA317860            | NCBI  |
| 17  | 200 | Parana River         | 61  | non-marine  | freshwater         | floodplain lakes         | South America            | 10             | 2012          | Illumina              | 528F          | Nex_18S_0964_R  | 22                                                         | 7540           | PRJEB23471; PRJEB23493 | ENA   |
| 18  | 201 | Swiss Soils          | 62  | non-marine  | soil               | soil                     | Switzerland              | 165            | 2013          | Illumina              | TAREuk454FWD1 | TAREukREV3      | 8                                                          | 49669          | PRJEB30010             | ENA   |
| 19  | 203 | Scandinavian Lakes   | 63  | non-marine  | freshwater         | lakes                    | Scandinavia              | 87             | 2011          | 454                   | TAREuk454FWD1 | TAREukREV3      | 8                                                          | 2782           | 7s6s8                  | Dryad |
| 20  | 204 | Global Soils         | 64  | non-marine  | soil               | global soils             | global                   | 40             | -             | 454                   | 515F          | 119r            | 18                                                         | 663            | -                      | -     |
| 21  | 205 | Tara Oceans V4       | 65  | marine      | euphotic           | global marine waters     | global                   | 67             | 2009-2013     | Illumina              | TAREuk454FWD1 | TAREukREV3      | 8                                                          | 20180          | PRJEB6610              | ENA   |
| 22  | 206 | Tara Arctic V4       | 65  | marine      | euphotic           | Arctic Ocean             | Arctic                   | 14             | 2009-2013     | Illumina              | TAREuk454FWD1 | TAREukREV3      | 8                                                          | 2209           | PRJEB9737              | ENA   |

**Supplementary Table 4.** Environmental diversity collected from public datasets. Reads were processed using DADA2<sup>48</sup>. OTUs were conservatively filtered to reduce the number of "contaminant" taxa being kept, and only OTUs that had at least 100 reads or were present in two or more distinct samples were retained.

| <b>Sample type</b>      | <b>No. of samples</b> | <b>No. of processed reads</b> | <b>No. of ASVs</b> | <b>No. of OTUs (97% similarity)</b> | <b>No. of OTUs post filtration</b> |
|-------------------------|-----------------------|-------------------------------|--------------------|-------------------------------------|------------------------------------|
| <b>soil</b>             | 359                   | 127,197,084                   | 78,806             | 20,474                              | 11,935                             |
| <b>freshwater</b>       | 405                   | 11,985,510                    | 49,903             | 10,067                              | 3,788                              |
| <b>marine euphotic</b>  | 628                   | 83,409,837                    | 90,017             | 20,440                              | 9,977                              |
| <b>marine aphotic</b>   | 168                   | 11,500,621                    | 14,205             | 4,268                               | 2,518                              |
| <b>non-marine (all)</b> | 764                   | 139,182,594                   | 128,709            | 30,541                              | 15,723                             |
| <b>Marine (all)</b>     | 796                   | 94,910,458                    | 104,222            | 24,708                              | 12,495                             |



## References

1. Lozupone, C. & Knight, R. UniFrac: A new phylogenetic method for comparing microbial communities. *Appl. Environ. Microbiol.* **71**, 8228–8235 (2005).
2. Sieber, G., Beisser, D., Bock, C. & Boenigk, J. Protistan and fungal diversity in soils and freshwater lakes are substantially different. *Sci. Rep.* **10**, (2020).
3. Bass, D. *et al.* Rhizarian ‘Novel Clade 10’ Revealed as Abundant and Diverse Planktonic and Terrestrial Flagellates, including *Aquavolon* n. gen. *J. Eukaryot. Microbiol.* **65**, 828–842 (2018).
4. Shen, W., Le, S., Li, Y. & Hu, F. SeqKit: A Cross-Platform and Ultrafast Toolkit for FASTA/Q File Manipulation. *PLoS One* **11**, e0163962 (2016).
5. Vaulot, D., Geisen, S., Mahé, F. & Bass, D. pr2-primers: An 18S rRNA primer database for protists. *Mol. Ecol. Resour.* **22**, 168–179 (2022).
6. Martin, M. Cutadapt removes adapter sequences from high-throughput sequencing reads. *EMBnet.journal* **17**, 10 (2011).
7. Smith, S. A. & O’Meara, B. C. TreePL: Divergence time estimation using penalized likelihood for large phylogenies. *Bioinformatics* **28**, 2689–2690 (2012).
8. Strassert, J. F. H., Irisarri, I., Williams, T. A. & Burki, F. A molecular timescale for eukaryote evolution with implications for the origin of red algal-derived plastids. *Nat. Commun.* **12**, 1–13 (2021).
9. Žerdoner Čalasan, A., Kretschmann, J. & Gottschling, M. They are young, and they are many: dating freshwater lineages in unicellular dinophytes. *Environ. Microbiol.* **21**, 4125–4135 (2019).
10. Batten, D. J. Cretaceous freshwater dinoflagellates. *Cretac. Res.* **10**, 271–273 (1989).
11. Gray, J. Evolution of the freshwater ecosystem: The fossil record. *Palaeogeogr. Palaeoclimatol. Palaeoecol.* **62**, 1–214 (1988).
12. Pattengale, N. D., Alipour, M., Bininda-Emonds, O. R. P., Moret, B. M. E. & Stamatakis, A. How many bootstrap replicates are necessary? *J. Comput. Biol.* **17**, 337–354 (2010).
13. Jones, E. B. G. *et al.* An online resource for marine fungi. *Fungal Divers.* **2019 961** **96**, 347–433 (2019).
14. Richards, T. A., Jones, M. D. M., Leonard, G. & Bass, D. Marine Fungi: Their Ecology and Molecular Diversity. *Ann. Rev. Mar. Sci.* **4**, 495–522 (2012).
15. Amend, A. From Dandruff to Deep-Sea Vents: *Malassezia*-like Fungi Are Ecologically Hyper-diverse. *PLoS Pathog.* **10**, e1004277 (2014).
16. Orsi, W., Biddle, J. F. & Edgcomb, V. Deep Sequencing of Subseafloor Eukaryotic rRNA Reveals Active Fungi across Marine Subsurface Provinces. *PLoS One* **8**, e56335 (2013).
17. Jing, H., Zhang, Y., Li, Y., Zhu, W. & Liu, H. Spatial Variability of Picoeukaryotic Communities in the Mariana Trench. *Sci. Rep.* **8**, 15357 (2018).
18. Bik, H. M., Halanych, K. M., Sharma, J. & Thomas, W. K. Dramatic Shifts in Benthic Microbial Eukaryote Communities following the Deepwater Horizon Oil Spill. *PLoS One* **7**, e38550 (2012).
19. Tisthammer, K. H., Cobian, G. M. & Amend, A. S. Global biogeography of marine fungi is shaped by the environment. *Fungal Ecol.* **19**, 39–46 (2016).
20. Marchese, P. *et al.* Fungi populate deep-sea coral gardens as well as marine sediments in the Irish Atlantic Ocean. *Environ. Microbiol.* **23**, 4168–4184 (2021).
21. Bochkansky, A. B., Clouse, M. A. & Herndl, G. J. Eukaryotic microbes, principally fungi and labyrinthulomycetes, dominate biomass on bathypelagic marine snow. *ISME J.* **11**,

- 362–373 (2017).
22. Bass, D. *et al.* Yeast forms dominate fungal diversity in the deep oceans. *Proc. R. Soc. B Biol. Sci.* **274**, 3069 (2007).
  23. Kilias, E. S. *et al.* Chytrid fungi distribution and co-occurrence with diatoms correlate with sea ice melt in the Arctic Ocean. *Commun. Biol.* **2020 31 3**, 1–13 (2020).
  24. Hassett, B. T. & Gradinger, R. Chytrids dominate arctic marine fungal communities. *Environ. Microbiol.* **18**, 2001–2009 (2016).
  25. Gutiérrez, M. H., Pantoja, S., Tejos, E. & Quiñones, R. A. The role of fungi in processing marine organic matter in the upwelling ecosystem off Chile. *Mar. Biol.* **158**, 205–219 (2011).
  26. Cunliffe, M., Hollingsworth, A., Bain, C., Sharma, V. & Taylor, J. D. Algal polysaccharide utilisation by saprotrophic planktonic marine fungi. *Fungal Ecol.* **30**, 135–138 (2017).
  27. Pachiadaki, M. G., Rédou, V., Beaudoin, D. J., Burgaud, G. & Edgcomb, V. P. Fungal and prokaryotic activities in the Marine subsurface biosphere at Peru Margin and canterbury basin inferred from RNA-based analyses and microscopy. *Front. Microbiol.* **7**, (2016).
  28. Orsi, W. D., Edgcomb, V. P., Christman, G. D. & Biddle, J. F. Gene expression in the deep biosphere. *Nat.* **2013 4997457 499**, 205–208 (2013).
  29. Karsten, H. XXXIII.—Contribution towards the knowledge of the Rhynchoprion penetrans. *Ann. Mag. Nat. Hist.* **15**, 293–312 (1865).
  30. Klaveness, D. *Collodictyon triciliatum* H.J. Carter (1865) - a common but fixation-sensitive algalivorous flagellate from the limnopelagial. *Nord. J. Freshw. Res.* **70**, 3–11 (1995).
  31. Zhao, S. *et al.* *Collodictyon*—an ancient lineage in the tree of eukaryotes. *Mol. Biol. Evol.* **29**, 1557–1568 (2012).
  32. Orr, R. J. S. *et al.* Enigmatic Diphyllozoa eukaryotes: culturing and targeted PacBio RS amplicon sequencing reveals a higher order taxonomic diversity and global distribution. *BMC Evol. Biol.* **18**, 115 (2018).
  33. Glücksman, E. *et al.* The Novel Marine Gliding Zooflagellate Genus *Mantamonas* (*Mantamonadida* ord. n.: Apusozoa). *Protist* **162**, 207–221 (2011).
  34. Kim, E., Sprung, B., Duhamel, S., Filardi, C. & Shin, M. K. Oligotrophic lagoons of the South Pacific Ocean are home to a surprising number of novel eukaryotic microorganisms. *Environ. Microbiol.* **18**, 4549–4563 (2016).
  35. Hehenberger, E. *et al.* Novel Predators Reshape Holozoan Phylogeny and Reveal the Presence of a Two-Component Signaling System in the Ancestor of Animals. *Curr. Biol.* **27**, 2043-2050.e6 (2017).
  36. Janouškovec, J. *et al.* A New Lineage of Eukaryotes Illuminates Early Mitochondrial Genome Reduction. *Curr. Biol.* **27**, 3717-3724.e5 (2017).
  37. Kies, L. & Kremer, B. P. Typification of the Glaucocystophyta. *Taxon* **35**, 128–133 (1986).
  38. Dittami, S. M., Heesch, S., Olsen, J. L. & Collén, J. Transitions between marine and freshwater environments provide new clues about the origins of multicellular plants and algae. *J. Phycol.* **53**, 731–745 (2017).
  39. Sánchez-Baracaldo, P., Raven, J. A., Pisani, D. & Knoll, A. H. Early photosynthetic eukaryotes inhabited low-salinity habitats. *Proc. Natl. Acad. Sci.* **114**, E7737–E7745 (2017).
  40. Gawryluk, R. M. R. *et al.* Non-photosynthetic predators are sister to red algae.

- Nature* **572**, (2019).
41. Jamy, M. *et al.* Long-read metabarcoding of the eukaryotic rDNA operon to phylogenetically and taxonomically resolve environmental diversity. *Mol. Ecol. Resour.* **20**, 429–443 (2020).
  42. Peura, S. *et al.* Ontogenic succession of thermokarst thaw ponds is linked to dissolved organic matter quality and microbial degradation potential. *Limnol. Oceanogr.* **65**, S248–S263 (2020).
  43. Urbina, H., Scofield, D. G., Cafaro, M. & Rosling, A. DNA-metabarcoding uncovers the diversity of soil-inhabiting fungi in the tropical island of Puerto Rico. *Mycoscience* **57**, 217–227 (2016).
  44. Kalsoom Khan, F. *et al.* Naming the untouchable – environmental sequences and niche partitioning as taxonomical evidence in fungi. *IMA Fungus* **11**, 1–12 (2020).
  45. Giner, C. R. *et al.* Marked changes in diversity and relative activity of picoeukaryotes with depth in the world ocean. *ISME J.* **14**, 437–449 (2020).
  46. Jamy, M. *et al.* Transitions datasets. *Figshare* <https://doi.org/10.6084/m9.figshare.15164772.v1> (2021).
  47. Vaulot, D. *et al.* metaPR2: a database of eukaryotic 18S rRNA metabarcodes with an emphasis on protists. *bioRxiv* 2022.02.04.479133 (2022).
  48. Callahan, B. J. *et al.* DADA2: High-resolution sample inference from Illumina amplicon data. *Nat. Methods* **13**, 581–583 (2016).
  49. Kopf, A. *et al.* The ocean sampling day consortium. *GigaScience* vol. 4 27 (2015).
  50. Logares, R. *et al.* Disentangling the mechanisms shaping the surface ocean microbiota. *Microbiome* 2020 **81**, 8, 1–17 (2020).
  51. Pernice, M. C., Logares, R., Guillou, L. & Massana, R. General Patterns of Diversity in Major Marine Microeukaryote Lineages. *PLoS One* **8**, e57170 (2013).
  52. Xu, Z. *et al.* Vertical Distribution of Microbial Eukaryotes From Surface to the Hadal Zone of the Mariana Trench. *Front. Microbiol.* **9**, 2023 (2018).
  53. Cruaud, P. *et al.* Annual Protist Community Dynamics in a Freshwater Ecosystem Undergoing Contrasted Climatic Conditions: The Saint-Charles River (Canada). *Front. Microbiol.* **10**, 2359 (2019).
  54. Shi, X., Li, S., Li, H., Chen, F. & Wu, Q. The Community Structure of Picophytoplankton in Lake Fuxian, a Deep and Oligotrophic Mountain Lake. *Front. Microbiol.* **0**, 2016 (2019).
  55. Shi, X., Li, S., Zhang, M., Liu, C. & Wu, Q. Temperature mainly determines the temporal succession of the photosynthetic picoeukaryote community in Lake Chaohu, a highly eutrophic shallow lake. *Sci. Total Environ.* **702**, 134803 (2020).
  56. Annenkova, N. V., Giner, C. R. & Logares, R. Tracing the Origin of Planktonic Protists in an Ancient Lake. *Microorganisms* **8**, 543 (2020).
  57. Simon, M. *et al.* Marked seasonality and high spatial variability of protist communities in shallow freshwater systems. *ISME J.* 2015 **99**, 9, 1941–1953 (2015).
  58. Filker, S., Sommaruga, R., Vila, I. & Stoeck, T. Microbial eukaryote plankton communities of high-mountain lakes from three continents exhibit strong biogeographic patterns. *Mol. Ecol.* **25**, 2286–2301 (2016).
  59. Salmaso, N., Boscaini, A. & Pindo, M. Unraveling the Diversity of Eukaryotic Microplankton in a Large and Deep Perialpine Lake Using a High Throughput Sequencing Approach. *Front. Microbiol.* **0**, 789 (2020).
  60. Mahé, F. *et al.* Parasites dominate hyperdiverse soil protist communities in

- Neotropical rainforests. *Nat. Ecol. Evol.* **1**, 0091 (2017).
61. Arroyo, A. S., López-Escardó, D., Kim, E., Ruiz-Trillo, I. & Najle, S. R. Novel Diversity of Deeply Branching Holomycota and Unicellular Holozoans Revealed by Metabarcoding in Middle Paraná River, Argentina. *Front. Ecol. Evol.* **0**, 99 (2018).
  62. Seppey, C. V. W. *et al.* Soil protist diversity in the Swiss western Alps is better predicted by topo-climatic than by edaphic variables. *J. Biogeogr.* **47**, 866–878 (2020).
  63. Khomich, M., Kauserud, H., Logares, R., Rasconi, S. & Andersen, T. Planktonic protistan communities in lakes along a large-scale environmental gradient. *FEMS Microbiol. Ecol.* **93**, 231 (2017).
  64. Bates, S. T. *et al.* Global biogeography of highly diverse protistan communities in soil. *ISME J.* **7**, 652–659 (2013).
  65. Ibarbalz, F. M. *et al.* Global Trends in Marine Plankton Diversity across Kingdoms of Life. *Cell* **179**, 1084-1097.e21 (2019).
